# Supplementary material
Source: PubMed Central journal article supplement (PMC2582381)
Supplement: NIHMS57290-supplement-SI.pdf [file NIHMS57290-supplement-SI.pdf]

# Pyrrole-2-Carboxylic Acid as a Ligand for the Cu-Catalyzed Reactions of Primary Anilines with Aryl Halides

*Ryan A. Altman, Kevin W. Anderson and Stephen L. Buchwald\**

Department of Chemistry, Massachusetts Institute of Technology

Cambridge, MA 02139

sbuchwal@mit.edu

## Supporting Information

### Table of Contents:

|                                                                                     |     |
|-------------------------------------------------------------------------------------|-----|
| General Considerations                                                              | S2  |
| General procedure for the Cu-catalyzed cross-coupling of anilines with aryl halides | S3  |
| Experimental procedure for the reactions described in Table 1                       | S4  |
| Experimental procedures for compounds in Table 2                                    | S4  |
| Experimental procedures for compounds in Table 3                                    | S9  |
| NMR Data                                                                            | S15 |
| References                                                                          | S37 |

## General Considerations

All reactions were carried out in resealable test tubes with teflon septa under an argon or nitrogen atmosphere. Copper(I) iodide (98%) was purchased from Strem. Pyrrole-2-carboxylic acid was purchased from Aldrich. Finely milled  $K_3PO_4$  was purchased from Fluka. The base was flame-dried under vacuum and cooled under nitrogen immediately prior to usage. The base is hygroscopic and excessive amounts of water lead to the formation of phenol and diaryl ether byproducts. Anilines were purchased from commercial sources and, when necessary, purified by distillation or sublimation. Aryl halides were purchased from commercial sources and, when necessary, were distilled or filtered through a plug of alumina before use. Anhydrous dimethylsulfoxide (DMSO) and *N,N'*-dimethylformamide (DMF) were purchased from Aldrich in SureSeal® bottles and used as received. Flash column chromatography was performed using a Biotage SP4 Flash Purification System using SNAP 10g silica cartridges. In all cases, dichloromethane was used to transfer the crude reaction material onto the silica gel samplet. The samplet was then air-dried before usage. A gradient elution using hexanes and ethyl acetate was performed, based on the recommendation from the Biotage TLC Wizard.

Yields reported in the publication are of isolated material and represent an average of at least two independent runs. Yields reported in the supporting information refer to a single experiment. Compounds described in the literature were characterized by comparing their  $^1H$  NMR and  $^{13}C$  NMR spectra, and melting points (m.p.) to the previously reported data; their purity was confirmed by gas chromatography (GC) or elemental analysis. GC analyses were performed on a Hewlett Packard 6890 instrument with an FID detector and a Hewlett Packard 10 m x 0.2 mm i.d. HP-1 capillary column using dodecane as an internal standard. Elemental analyses were performed by Atlantic Microlabs, Inc., Norcross, GA. Previously unknown

compounds were synthesized, purified and analyzed from a single run and the reactions used to form them were then repeated to determine an average yield. They were characterized by  $^1\text{H}$  NMR,  $^{13}\text{C}$  NMR, m.p., IR and elemental analysis.  $^1\text{H}$  NMR and  $^{13}\text{C}$  NMR spectra were recorded on Varian 500 MHz instruments with chemical shifts reported relative to the deuterated solvent or TMS. IR spectra were recorded on a Perkin-Elmer System 2000 FT-IR instrument for all previously unknown compounds (KBr disc). Melting points (uncorrected) were obtained on a Mel-Temp II capillary melting point apparatus.

### **General procedure for the Cu-catalyzed cross-coupling of anilines with aryl halides**

An oven-dried screw-cap test tube was charged with  $\text{K}_3\text{PO}_4$  (424 mg, 2.0 mmol). The tube was sealed and the base was flame-dried under vacuum, and cooled under a purge of  $\text{N}_2$ .  $\text{CuI}$  (19 mg, 0.10 mmol), Pyrrole-2-carboxylic acid (22 mg, 0.20 mmol), aryl halide (1.0 mmol, if solid), amine (2.0 mmol, if solid) and a magnetic stir bar were added to the cooled vessel. The tube was then evacuated and back-filled with nitrogen. The evacuation/backfill sequence was repeated two additional times. Aryl halide (1.0 mmol, if liquid), amine (2.0 mmol, if liquid) and DMSO (0.50 mL) were then added by syringe. The vessel was immersed in a preheated oil bath and the reaction mixture was stirred vigorously until TLC and/or GC analysis of the crude reaction mixture indicated that the aryl halide had been completely consumed. The reaction mixture was cooled to room temperature. Ethyl acetate (15 mL),  $\text{NH}_4\text{Cl}_{(\text{aq})}$  (2 mL), and  $\text{H}_2\text{O}$  (1mL) were added and the mixture was stirred. The organic layer was separated, and filtered through a plug of silica. The aqueous layer was extracted twice more with ethyl acetate (10 mL), and each extract was sequentially filtered through the pad of silica gel. The filtrate was concentrated and the resulting residue was purified by flash chromatography (hexanes/ethyl

acetate, gradient elution) to provide the desired product.

### Experimental procedure for the reactions described in Table 1

An oven-dried screw-cap test tube was charged with CuI (9.5 mg, 0.050 mmol), ligand (0.20 mmol, if solid), and a magnetic stir bar. The tubes were transferred into a nitrogen-filled glove box where flame-dried anhydrous K<sub>3</sub>PO<sub>4</sub> (212 mg, 1.0 mmol) was added. The tubes were sealed with a Teflon septum and removed from the glovebox, where iodobenzene (56  $\mu$ L, 0.5 mmol), aniline (92  $\mu$ L, 1.0 mmol) and DMSO (0.25 mL) were successfully added by syringe. The vessel was immersed in a preheated oil bath and the reaction mixture was stirred vigorously for 12 h at 80 °C. The reaction mixture was cooled to room temperature. Dodecane (112  $\mu$ L), ethyl acetate (15 mL), NH<sub>4</sub>Cl<sub>(aq)</sub> (2 mL), and H<sub>2</sub>O (1mL) were added, and the mixture was stirred. The organic layer was sampled and analyzed by GC.

### Experimental procedures for compounds in Table 2

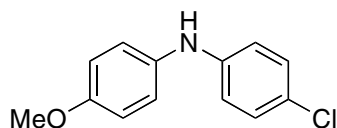

#### 4-chloro-*N*-(4-methoxyphenyl)aniline (Entry 1)

The general procedure was followed using CuI (19 mg, 0.10 mmol), pyrrole-2-carboxylic acid (22 mg, 0.20 mmol), K<sub>3</sub>PO<sub>4</sub> (424 mg, 2.0 mmol), 4-chloriodobenzene (238 mg, 1.00 mmol), and *p*-anisidine (182 mg, 1.5 mmol) with DMSO (0.50 mL) as solvent for 20 h at 80 °C. Workup and chromatographic purification (hexanes / ethyl acetate 1:0  $\rightarrow$  4:1) afforded the title compound as an off-white solid (188 mg, 81 %). m.p. 49-50.5 °C (lit. 50-51°C).<sup>i</sup> <sup>1</sup>H NMR (500 MHz, CDCl<sub>3</sub>)  $\delta$  7.18-7.13 (2H, m), 7.09-7.03 (2H, m), 6.90-6.80 (m, 4H), 5.48 (1H, bs), 3.81 (3H, s).

$^{13}\text{C}$  NMR (125 MHz,  $\text{CDCl}_3$ )  $\delta$  155.8, 144.1, 135.4, 129.4, 124.5, 122.7, 116.8, 114.9, 55.8.

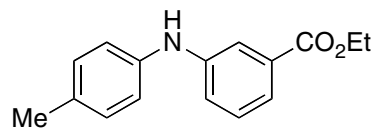

ethyl 3-(*p*-tolylamino)benzoate (Entry 2)

The general procedure was followed using CuI (9.5 mg, 0.05 mmol), pyrrole-2-carboxylic acid (11 mg, 0.10 mmol),  $\text{K}_3\text{PO}_4$  (424 mg, 2.0 mmol), ethyl-3-iodobenzoate (167  $\mu\text{L}$ , 1.00 mmol), and *p*-toluidine (214 mg, 2.0 mmol) with DMSO (0.50 mL) as solvent for 24 h at 80  $^\circ\text{C}$ . Workup and chromatographic purification (hexanes / ethyl acetate 1:0  $\rightarrow$  4:1) afforded the title compound as a tan solid (199 mg, 78 %). m.p. 95-96  $^\circ\text{C}$ .  $^1\text{H}$  NMR (500 MHz,  $\text{CDCl}_3$ )  $\delta$  7.66 (1H, dd,  $J$  = 1.8, 2.0 Hz), 7.54 (1H, ddd,  $J$  = 1.1, 1.5, 7.6 Hz), 7.29 (1H, t,  $J$  = 7.8 Hz), 7.20 (1H, ddd,  $J$  = 0.9, 2.5, 8.1 Hz), 7.13-7.11 (2H, m), 7.04-7.01 (2H, m), 5.73 (1H, bs), 4.37 (2H, q,  $J$  = 7.1 Hz), 2.33 (3H, s), 1.39 (3H, t,  $J$  = 7.1 Hz).  $^{13}\text{C}$  NMR (125 MHz,  $\text{CDCl}_3$ )  $\delta$  166.9, 144.4, 139.8, 131.8, 130.2, 120.4, 121.2, 120.6, 119.5, 117.5, 61.1, 20.9, 14.5. IR (KBr disc,  $\text{cm}^{-1}$ ) 3356, 1701, 1604, 1589, 1526, 1487, 1367, 1280, 1219, 1106, 1025, 829, 801, 752. Anal. Calc. for  $\text{C}_{16}\text{H}_{17}\text{NO}_2$ : C 75.27, H 6.71. Found: C 75.51, H 6.74.

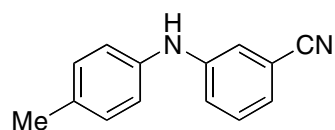

3-(*p*-tolylamino)benzonitrile (Entry 3)<sup>ii</sup>

The general procedure was followed using CuI (9.5 mg, 0.05 mmol), pyrrole-2-carboxylic acid (11 mg, 0.10 mmol),  $\text{K}_3\text{PO}_4$  (424 mg, 2.0 mmol), 3-iodobenzonitrile (229 mg, 1.00 mmol), and *p*-toluidine (214 mg, 2.0 mmol) with DMSO (0.50 mL) as solvent for 24 h at 90  $^\circ\text{C}$ . Workup and chromatographic purification (hexanes / ethyl acetate 1:0  $\rightarrow$  4:1) afforded the title compound as an tan solid (150mg, 72 %). m.p. 71-73 $^\circ\text{C}$ .  $^1\text{H}$  NMR (500 MHz,  $\text{CDCl}_3$ )  $\delta$  7.30-7.28 (1H, m),

7.20-7.15 (2H, m), 7.13 (1H, ddd,  $J = 0.9, 2.4, 7.4$  Hz), 7.09 (1H, ddd,  $J = 1.1, 1.4, 7.5$  Hz), 7.05-7.02 (2H, m), 5.78 (1H, bs), 2.35 (3H, s).  $^{13}\text{C}$  NMR (125 MHz,  $\text{CDCl}_3$ )  $\delta$  145.5, 138.4, 133.3, 130.4, 130.3, 123.1, 120.1, 119.3, 118.1, 113.2, 21.0. IR (KBr disc,  $\text{cm}^{-1}$ ) 3398, 2226, 1598, 1523, 1489, 1312, 996, 867, 818, 780, 681. Anal. Calc. for  $\text{C}_{14}\text{H}_{12}\text{N}_2$ : C 80.74, H 5.81. Found: C 80.49, H 5.74.

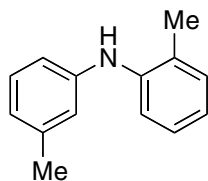

#### 2-methyl-*N-m*-tolylaniline (Entry 4)<sup>iii</sup>

The general procedure was followed using CuI (19 mg, 0.10 mmol), pyrrole-2-carboxylic acid (22 mg, 0.20 mmol),  $\text{K}_3\text{PO}_4$  (424 mg, 2.0 mmol), 2-iodotoluene (127  $\mu\text{L}$ , 1.00 mmol), and *m*-toluidine (216  $\mu\text{L}$ , 2.0 mmol) with DMSO (0.50 mL) as solvent for 30 h at 80  $^\circ\text{C}$ . Workup and chromatographic purification (hexanes / ethyl acetate 1:0  $\rightarrow$  4:1) afforded the title compound as a tan oil (144 mg, 75 %).  $^1\text{H}$  NMR (500 MHz,  $\text{CDCl}_3$ )  $\delta$  7.26 (1H, d,  $J = 6.9$  Hz), 7.22 (1H, d,  $J = 7.5$  Hz), 7.17 (2H, m), 6.97-6.94 (1H, m), 6.81-6.75 (m, 3H), 5.36 (1H, bs), 2.33 (3H, s), 2.28 (3H, s).  $^{13}\text{C}$  NMR (125 MHz,  $\text{CDCl}_3$ )  $\delta$  144.0, 141.5, 139.3, 131.1, 129.3, 128.3, 126.9, 122.0, 122.5, 118.9, 118.3, 114.7, 21.7, 18.1.

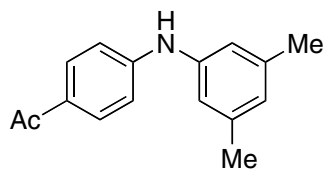

#### 1-(4-(3,5-dimethylphenylamino)phenyl)ethanone (Entry 5)

The general procedure was followed using CuI (19 mg, 0.10 mmol), pyrrole-2-carboxylic acid (22 mg, 0.20 mmol),  $\text{K}_3\text{PO}_4$  (424 mg, 2.0 mmol), 5-iodo-*m*-xylene (144  $\mu\text{L}$ , 1.00 mmol), and 1-

(4-aminophenyl)ethanone (270 mg, 2.0 mmol) with DMSO (0.50 mL) as solvent for 24 h at 90 °C. Workup and chromatographic purification (hexanes / ethyl acetate 1:0 → 4:1) afforded the title compound as a yellow solid (136 mg, 57 %). m.p. 131-134 °C. <sup>1</sup>H NMR (500 MHz, CDCl<sub>3</sub>) δ 7.90-7.86 (2H, m), 7.01-6.97 (2H, m), 6.81 (2H, s), 6.74 (1H, s), 6.02 (1H, bs), 2.54 (3H, s), 2.32 (6H, s). <sup>13</sup>C NMR (125 MHz, CDCl<sub>3</sub>) δ 196.6, 148.8, 140.6, 139.5, 130.8, 129.0, 125.4, 118.7, 114.6, 26.4, 21.6. IR (KBr disc, cm<sup>-1</sup>) 3331, 1653, 1570, 1342, 1274, 1181, 1168, 827. Anal. Calc. for C<sub>16</sub>H<sub>17</sub>NO: C 80.30, H 7.16. Found: C 80.22, H 7.18.

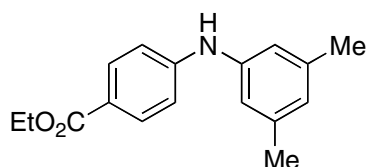

#### ethyl 4-(3,5-dimethylphenylamino)benzoate (Entry 6)

The general procedure was followed using CuI (19 mg, 0.10 mmol), pyrrole-2-carboxylic acid (22 mg, 0.20 mmol), K<sub>3</sub>PO<sub>4</sub> (424 mg, 2.0 mmol), 5-iodo-*m*-xylene (144 μL, 1.00 mmol), and ethyl-4-aminobenzoate (330 mg, 2.0 mmol) with DMSO (0.50 mL) as solvent for 24 h at 90 °C. Workup and chromatographic purification (hexanes / ethyl acetate 1:0 → 4:1) afforded the title compound as a white solid (138 mg, 51%). m.p. 119-120 °C. <sup>1</sup>H NMR (500 MHz, CDCl<sub>3</sub>) δ 7.94-7.91 (2H, m), 7.00-6.96 (2H, m), 6.81 (2H, m), 6.72 (1H, m), 5.96 (1H, s), 4.35 (2H, q, *J* = 7.1 Hz), 2.31 (3H, s), 1.38 (3H, t, *J* = 7.1 Hz). <sup>13</sup>C NMR (125 MHz, CDCl<sub>3</sub>) δ 166.7, 148.3, 141.0, 139.4, 131.6, 125.1, 121.4, 118.3, 114.8, 60.6, 21.6, 14.6. IR (KBr disc, cm<sup>-1</sup>) 2241, 1697, 1595, 1509, 1352, 1285, 1170, 830, 769. Anal. Calc. for C<sub>17</sub>H<sub>19</sub>NO<sub>2</sub>: C 75.81, H 7.11. Found: C 76.13, H 6.94.

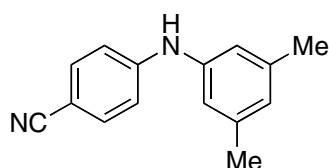

4-(3,5-dimethylphenylamino)benzonitrile (Entry 7)<sup>iv</sup>

The general procedure was followed using CuI (19 mg, 0.10 mmol), pyrrole-2-carboxylic acid (22 mg, 0.20 mmol), K<sub>3</sub>PO<sub>4</sub> (424 mg, 2.0 mmol), 5-iodo-*m*-xylene (144  $\mu$ L, 1.00 mmol), and 4-aminobenzonitrile (236 mg, 2.0 mmol) with DMSO (0.50 mL) as solvent for 24 h at 90 °C. Workup and chromatographic purification (hexanes / ethyl acetate 1:0  $\rightarrow$  4:1) afforded the title compound as a yellow solid (113 mg, 51%). m.p. 154-155 °C. <sup>1</sup>H NMR (500 MHz, CDCl<sub>3</sub>)  $\delta$  2.32 (3H, s), 7.49-7.46 (2H, m), 6.97-6.94 (2H, m), 6.80 (2H, s), 6.77 (1H, s), 6.00 (1H, bs). <sup>13</sup>C NMR (125 MHz, CDCl<sub>3</sub>)  $\delta$  148.1, 139.7, 139.4, 133.7, 125.7, 120.0, 118.9, 114.8, 101.1, 21.3. IR (KBr disc, cm<sup>-1</sup>) 3335, 2214, 1591, 1532, 1350, 1170, 826. Anal. Calc. for C<sub>15</sub>H<sub>14</sub>N<sub>2</sub>: C 81.05, H 6.35. Found: C 80.76, H 6.33.

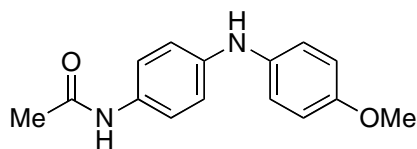*N*-(4-(4-methoxyphenylamino)phenyl)acetamide (Entry 8)

The general procedure was followed using CuI (19 mg, 0.10 mmol), pyrrole-2-carboxylic acid (22 mg, 0.20 mmol), K<sub>3</sub>PO<sub>4</sub> (424 mg, 2.0 mmol), 4-iodoanisole (234 mg, 1.00 mmol), and *N*-(4-aminophenyl)acetamide (300 mg, 2.0 mmol) with DMSO (0.70 mL) as solvent for 24 h at 80 °C. Workup and chromatographic purification (hexanes / ethyl acetate 1:0  $\rightarrow$  4:1) afforded the title compound as a white solid (212 mg, 83 %). m.p. 138-139 °C (lit. 138 °C).<sup>v</sup> <sup>1</sup>H NMR (500 MHz, CDCl<sub>3</sub>)  $\delta$  7.33-7.30 (2H, m), 7.16 (1H, bs), 7.10-7.02 (2H, m), 6.90-.84 (m, 4H), 5.47 (1H, bs), 3.80 (3H, s), 2.15 (3H, s). <sup>13</sup>C NMR (125 MHz, CDCl<sub>3</sub>)  $\delta$  168.4, 155.2, 142.1, 136.3, 130.4, 122.2, 121.7, 116.7, 114.9, 55.8, 24.6. IR (KBr disc, cm<sup>-1</sup>) 3270, 1653, 1512, 1297, 1248, 1035, 819. Anal. Calc. for C<sub>15</sub>H<sub>16</sub>N<sub>2</sub>O<sub>2</sub>: C 70.29, H 6.29. Found: C 70.55, H 6.32.

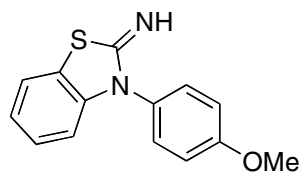

### 3-(4-methoxyphenyl)benzo[d]thiazol-2(3*H*)-imine (Entry 9)

The general procedure was followed using CuI (19 mg, 0.10 mmol), pyrrole-2-carboxylic acid (22 mg, 0.20 mmol), K<sub>2</sub>CO<sub>3</sub> (280 mg, 2.0 mmol), 4-iodoanisole (234 mg, 1.00 mmol), and 2-aminobenzothiazole (298 mg, 2.0 mmol) with DMSO (0.80 mL) as solvent for 24 h at 90 °C. Workup and chromatographic purification (hexanes / ethyl acetate 1:0 → 4:1) afforded the title compound as a white solid (169 mg, 66 %). m.p. 91.5-92 °C. <sup>1</sup>H NMR (500 MHz, CDCl<sub>3</sub>) δ 7.53 (1H, td, *J* = 0.6, 7.8 Hz), 7.-7.41 (1H, m), 7.31 (1H, dd, *J* = 0.6, 8.2 Hz), 7.13-7.07 (3H, m), 6.07 (1H, bs), 6.84-6.82 (2H, bs), 3.78 (3H, s). <sup>13</sup>C NMR (125 MHz, CDCl<sub>3</sub>) δ 159.3, 139.0, 136.6, 131.2, 130.7, 125.0, 124.2, 119.9, 115.4, 115.3, 110.4, 55.6. IR (KBr disc, cm<sup>-1</sup>) 3220, 2235, 1591, 1580, 1493, 1404, 1289, 1246, 1175, 1021, 824, 753. Anal. Calc. for C<sub>14</sub>H<sub>12</sub>N<sub>2</sub>OS: C 65.60, H 4.72. Found: C 65.64, H 4.75.

### Experimental procedures for compounds in Table 3

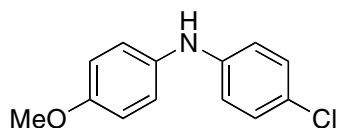

### 4-chloro-*N*-(4-methoxyphenyl)aniline (Entry 1)

The general procedure was followed using CuI (19 mg, 0.10 mmol), pyrrole-2-carboxylic acid (22 mg, 0.20 mmol), K<sub>3</sub>PO<sub>4</sub> (424 mg, 2.0 mmol), 1-bromo-4-chlorobenzene (191 mg, 1.00 mmol), and *p*-anisidine (248 mg, 2.0 mmol) with DMSO (0.50 mL) as solvent for 24 h at 100 °C. Workup and chromatographic purification (hexanes / ethyl acetate 1:0 → 4:1) afforded the title

compound as a tan solid (180 mg, 77 %). m.p. 50-51 °C (lit. 50-51°C).<sup>vi</sup> <sup>1</sup>H NMR (500 MHz, CDCl<sub>3</sub>) δ 7.18-7.13 (2H, m), 7.09-7.03 (2H, m), 6.90-6.80 (m, 4H), 5.48 (1H, bs), 3.81 (3H, s).

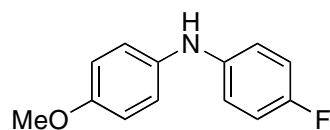

4-fluoro-*N*-(4-methoxyphenyl)aniline (Entry 2)

The general procedure was followed using CuI (19 mg, 0.10 mmol), pyrrole-2-carboxylic acid (22 mg, 0.20 mmol), K<sub>3</sub>PO<sub>4</sub> (424 mg, 2.0 mmol), 1-bromo-4-fluorobenzene (109 μL, 1.00 mmol), and *p*-anisidine (248 mg, 2.0 mmol) with DMSO (0.50 mL) as solvent for 24 h at 80 °C. Workup and chromatographic purification (hexanes / ethyl acetate 1:0 → 4:1) afforded the title compound as a tan solid (155 mg, 71 %). m.p. 57-59 °C (lit. 59 °C).<sup>vii</sup> <sup>1</sup>H NMR (500 MHz, CDCl<sub>3</sub>) δ 7.03-7.00 (2H, m), 6.96-6.85 (6H, m), 5.40 (1H, bs), 3.81 (3H, s). <sup>13</sup>C NMR (125 MHz, CDCl<sub>3</sub>) δ 158.3, 155.2, 141.3 (d), 136.7, 121.4, 117.9 (d), 116.1, 115.9, 114.9, 55.8.

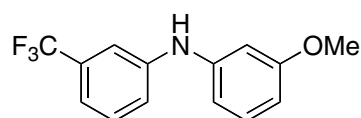

3-methoxy-*N*-(3-(trifluoromethyl)phenyl)aniline (Entry 3)<sup>viii</sup>

The general procedure was followed using CuI (19 mg, 0.10 mmol), pyrrole-2-carboxylic acid (22 mg, 0.20 mmol), K<sub>3</sub>PO<sub>4</sub> (424 mg, 2.0 mmol), 3-bromoanisole (127 μL, 1.00 mmol), and 3-aminobenzotrifluoride (250 μL, 2.0 mmol) with DMSO (0.50 mL) as solvent for 24 h at 100 °C. Workup and chromatographic purification (hexanes / ethyl acetate 1:0 → 4:1) afforded the title compound as an orange oil (153 mg, 57%). <sup>1</sup>H NMR (500 MHz, CDCl<sub>3</sub>) δ 7.36 (1H, t, *J* = 7.9 Hz), 7.30 (1H, s), 7.26-7.20 (2H, m), 7.16 (1H, d, *J* = 7.8 Hz), 6.70 (1H, dd, *J* = 1.2, 8.1 Hz), 6.67 (1H, s), 6.59 (1H, d, *J* = 8.2 Hz), 5.85 (1H, bs), 3.81 (3H, s). <sup>13</sup>C NMR (125 MHz, CDCl<sub>3</sub>) δ 160.9, 143.9, 143.4, 132.1, 130.5, 130.0, 129.9, 120.4, 117.3 (q), 113.0 (t), 111.4 (d), 107.6 (d),

104.7, 55.4.

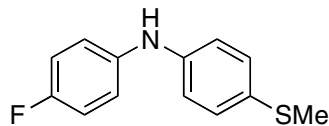

4-fluoro-*N*-(4-(methylthio)phenyl)aniline (Entry 4)

The general procedure was followed using CuI (19 mg, 0.10 mmol), pyrrole-2-carboxylic acid (22 mg, 0.20 mmol), K<sub>3</sub>PO<sub>4</sub> (424 mg, 2.0 mmol), 4-bromothioanisole (203 mg, 1.00 mmol), and 4-fluoroaniline (189  $\mu$ L, 2.0 mmol) with DMSO (0.50 mL) as solvent for 24 h at 100 °C. Workup and chromatographic purification (hexanes / ethyl acetate 1:0  $\rightarrow$  4:1) afforded the title compound as a brown oil (170 mg, 73 %). <sup>1</sup>H NMR (500 MHz, CDCl<sub>3</sub>)  $\delta$  7.21-7.17 (2H, m), 7.02-6.92 (4H, m), 6.89-6.86 (2H, m), 5.56 (1H, bs), 2.41 (3H, s). <sup>13</sup>C NMR (125 MHz, CDCl<sub>3</sub>)  $\delta$  159.2, 142.4, 139.0 (d), 130.3, 129.7, 120.6 (d), 117.7, 116.1 (d), 18.2. IR (KBr disc, cm<sup>-1</sup>) 3396, 1595, 1508, 1314, 1223, 817, 506. Anal. Calc. for C<sub>13</sub>H<sub>12</sub>FNS: C 66.93, H 5.18. Found: C 67.16, H 5.20.

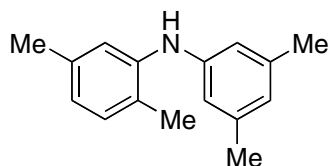

*N*-(3,5-dimethylphenyl)-2,5-dimethylaniline (Entry 5)

The general procedure was followed using CuI (19 mg, 0.10 mmol), 2-isobutyrylcyclohexanone (33  $\mu$ L, 0.20 mmol), K<sub>3</sub>PO<sub>4</sub> (424 mg, 2.0 mmol), 5-bromo-*m*-xylene (136  $\mu$ L, 1.00 mmol), and 2,5-dimethylaniline (249  $\mu$ L, 2.0 mmol) with DMF (0.50 mL) as solvent for 24 h at 110 °C. Workup and chromatographic purification (hexanes / ethyl acetate 1:0  $\rightarrow$  4:1) afforded the title compound as a yellow oil (166 mg, 74 %). <sup>1</sup>H NMR (500 MHz, CDCl<sub>3</sub>)  $\delta$  7.05-7.02 (2H, s), 6.72 (1H, td, *J* = 0.4, 7.6 Hz), 6.56 (2H, d, *J* = 0.6 Hz), 6.53 (1H, t, *J* = 0.6 Hz), 5.22 (1H, bs), 2.26

(3H, s), 2.23 (6H, s), 2.17 (3H, s).  $^{13}\text{C}$  NMR (125 MHz,  $\text{CDCl}_3$ )  $\delta$  144.2, 141.3, 139.2, 136.6, 130.9, 125.4, 122.8, 122.4, 119.9, 116.8, 115.4, 21.6, 21.4, 17.7. IR (KBr disc,  $\text{cm}^{-1}$ ) 3383, 3020, 2919, 1601, 1578, 1522, 1466, 1221, 1177, 829, 802. Anal. Calc. for  $\text{C}_{14}\text{H}_{12}\text{F}_3\text{NO}$ : C 62.92, H 4.53. Found: C 63.13, H 4.46.

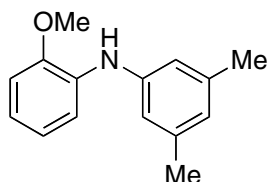

*N*-(2-methoxyphenyl)-3,5-dimethylaniline (Entry 6)<sup>ix</sup>

The general procedure was followed using CuI (19 mg, 0.10 mmol), pyrrole-2-carboxylic acid (22 mg, 0.20 mmol),  $\text{K}_3\text{PO}_4$  (424 mg, 2.0 mmol), 5-bromo-*m*-xylene (136  $\mu\text{L}$ , 1.00 mmol), and *o*-anisidine (225  $\mu\text{L}$ , 2.0 mmol) with DMSO (0.50 mL) as solvent for 24 h at 100  $^\circ\text{C}$ . Workup and chromatographic purification (hexanes / ethyl acetate 4:1  $\rightarrow$  1:0) afforded the title compound as an orange oil (155 mg, 68%).  $^1\text{H}$  NMR (500 MHz,  $\text{CDCl}_3$ )  $\delta$  7.33-7.31 (1H, m), 6.91-6.84 (3H, m), 6.81 (2H, d,  $J = 0.6$  Hz), 6.62 (1H, t,  $J = 0.6$  Hz), 6.10 (1H, s), 3.89 (3H, s), 2.30 (3H, s).  $^{13}\text{C}$  NMR (125 MHz,  $\text{CDCl}_3$ )  $\delta$  148.4, 142.8, 139.1, 123.2, 121.0, 119.8, 118.7, 116.5, 115.0, 110.6, 55.8, 21.6.

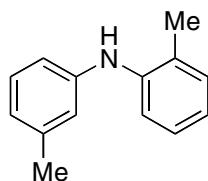

2-methyl-*N*-*m*-tolylaniline (Entry 7)<sup>3</sup>

The general procedure was followed using CuI (19 mg, 0.10 mmol), pyrrole-2-carboxylic acid (22 mg, 0.20 mmol),  $\text{K}_3\text{PO}_4$  (424 mg, 2.0 mmol), 2-bromotoluene (120  $\mu\text{L}$ , 1.00 mmol), and *m*-toluidine (216  $\mu\text{L}$ , 2.0 mmol) with DMSO (0.50 mL) as solvent for 30 h at 100  $^\circ\text{C}$ . Workup and

chromatographic purification (hexanes / ethyl acetate 1:0  $\rightarrow$  4:1) afforded the title compound as a tan oil (129 mg, 66 %).  $^1\text{H}$  NMR (500 MHz,  $\text{CDCl}_3$ )  $\delta$  7.26 (1H, d,  $J$  = 6.9 Hz), 7.22 (1H, d,  $J$  = 7.5 Hz), 7.17 (2H, m), 6.97-6.94 (1H, m), 6.81-6.75 (3H, m), 5.36 (1H, bs), 2.33 (3H, s), 2.28 (3H, s).  $^{13}\text{C}$  NMR (125 MHz,  $\text{CDCl}_3$ )  $\delta$  144.0, 141.5, 139.3, 131.1, 139.3, 128.3, 126.9, 122.0, 122.5, 118.9, 118.3, 114.7, 21.7, 18.1.

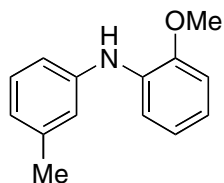

2-methoxy-*N*-*m*-tolylaniline (Entry 8)<sup>x</sup>

The general procedure was followed using CuI (19 mg, 0.10 mmol), pyrrole-2-carboxylic acid (22 mg, 0.20 mmol),  $\text{K}_3\text{PO}_4$  (424 mg, 2.0 mmol), 2-bromoanisole (125  $\mu\text{L}$ , 1.00 mmol), and *m*-toluidine (216  $\mu\text{L}$ , 2.0 mmol) with DMSO (0.50 mL) as solvent for 30 h at 100  $^\circ\text{C}$ . Workup and chromatographic purification (hexanes / ethyl acetate 1:0  $\rightarrow$  4:1) afforded the title compound as an orange oil (142 mg, 66%).  $^1\text{H}$  NMR (500 MHz,  $\text{CDCl}_3$ )  $\delta$  7.36-7.33 (1H, m), 7.23-7.18 (1H, m), 7.02-6.87 (5H, m), 6.81 (1H, d,  $J$  = 7.5 Hz), 6.16 (1H, bs), 3.29 (3H, s), 2.36 (3H, s).  $^{13}\text{C}$  NMR (125 MHz,  $\text{CDCl}_3$ )  $\delta$  148.4, 142.8, 139.3, 133.2, 129.3, 122.2, 121.0, 119.9, 119.4, 115.8, 114.9, 110.6, 55.8, 21.7.

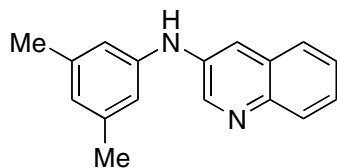

*N*-(3,5-dimethylphenyl)quinolin-3-amine (Entry 9)

The general procedure was followed using CuI (19 mg, 0.10 mmol), pyrrole-2-carboxylic acid (22 mg, 0.20 mmol),  $\text{K}_3\text{PO}_4$  (424 mg, 2.0 mmol), 3-bromoquinoline (136  $\mu\text{L}$ , 1.00 mmol), and

3,5-dimethylaniline (248  $\mu$ L, 2.0 mmol) with DMSO (0.50 mL) as solvent for 24 h at 100  $^{\circ}$ C. Workup and chromatographic purification (hexanes / ethyl acetate 4:1  $\rightarrow$  1:0) afforded the title compound as a green oil (135 mg, 54 %).  $^1\text{H}$  NMR (500 MHz,  $\text{CDCl}_3$ )  $\delta$  8.72 (1H, d,  $J$  = 2.8 Hz), 8.02 (1H, dd,  $J$  = 0.6, 8.2 Hz), 7.70 (1H, d,  $J$  = 2.8 Hz), 7.65 (1H, dd,  $J$  = 1.2, 8.1 Hz), 7.54-7.46 (2H, m), 6.82 (2H, s), 6.71 (1H, d,  $J$  = 0.6 Hz), 6.12 (1H, s), 2.32 (6H, s).  $^{13}\text{C}$  NMR (125 MHz,  $\text{CDCl}_3$ )  $\delta$  145.3, 143.7, 141.9, 139.6, 137.4, 120.2, 129.1, 127.2, 126.6, 126.5, 124.4, 117.2, 116.5, 21.6. IR (KBr disc,  $\text{cm}^{-1}$ ) 3265, 3038, 1596, 1491, 1470, 1361, 1215, 1140, 908, 834, 781, 749, 732.

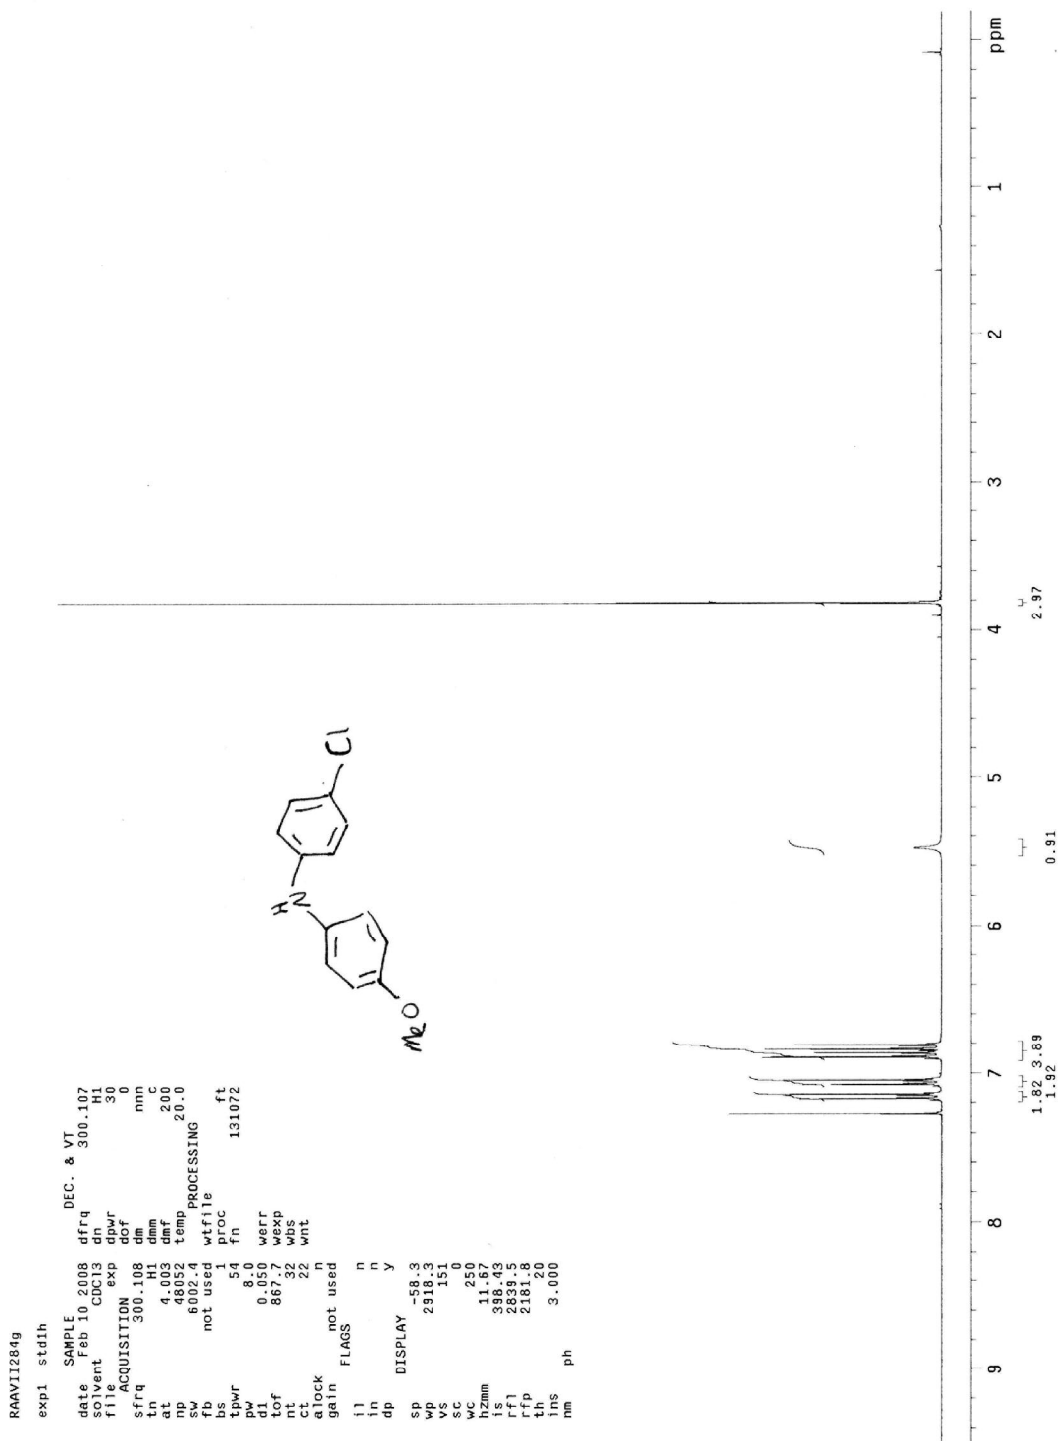

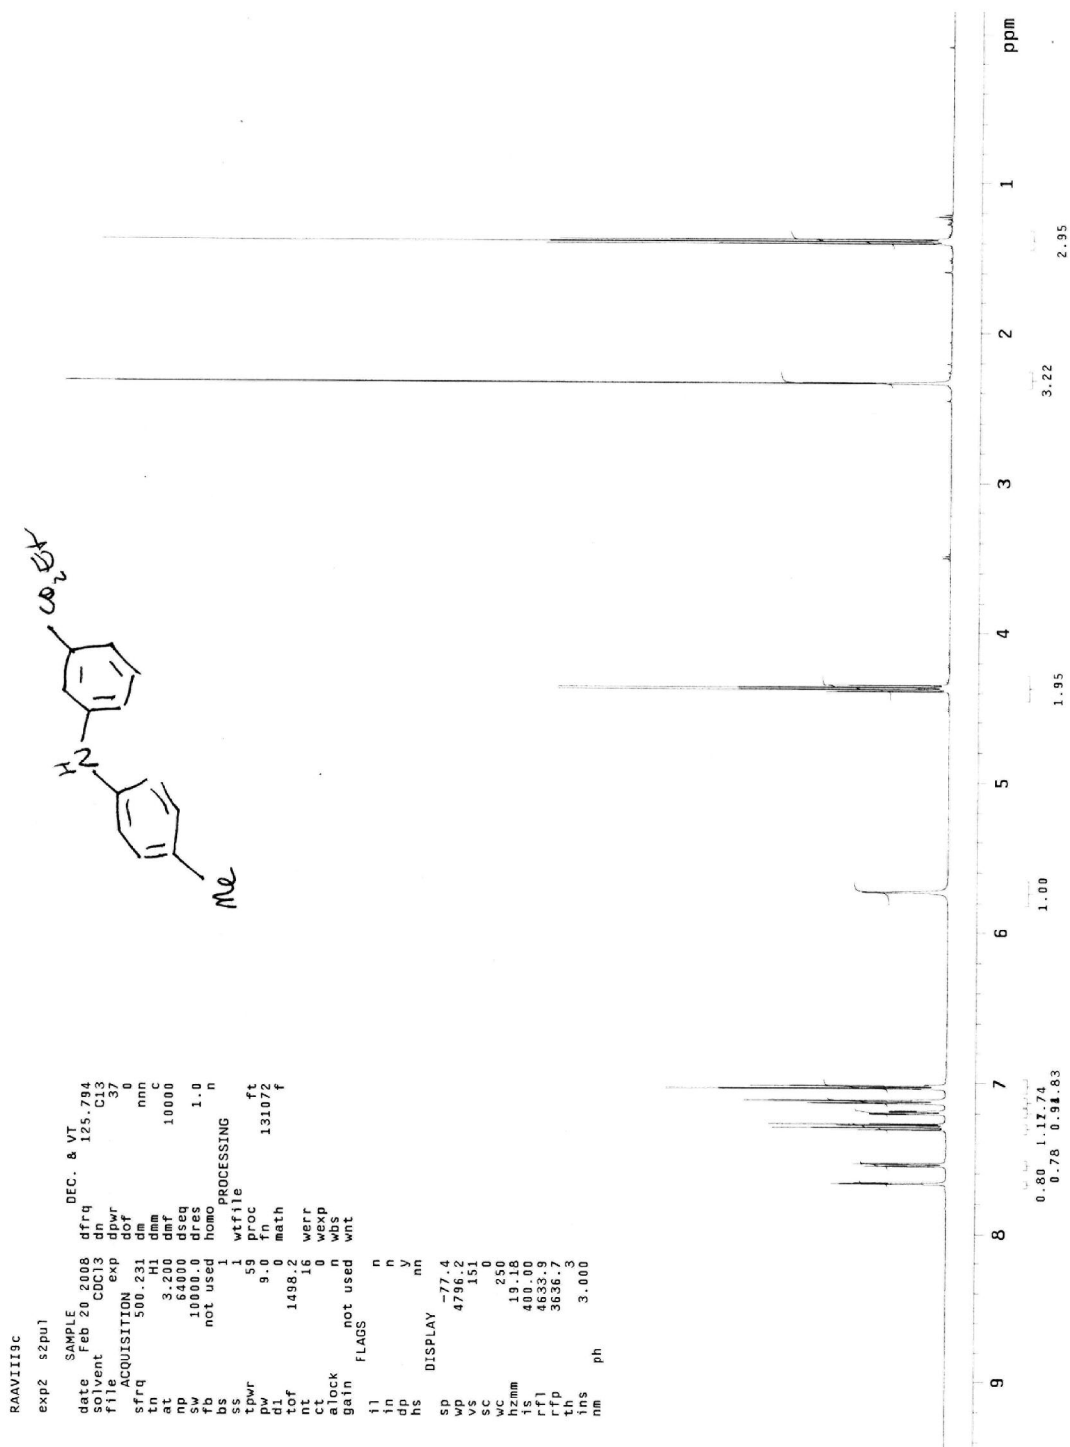

## STANDARD CARBON PARAMETERS

```

exp1 $2bu1
SAMPLE
date Feb 15 2008 DEC. & VT
solvent CDCl3 dn 489.744
file 41
ACQUISITION exp 41
sfrq 125.672 dm yvy
at 2.013 dm 10000
np 125588 dseq
sw 31397.2 dres 1.0
fb not used homo n
bs 8 DEC2
tpwr 57 dfraq2 0
pw 6.7 dn2 1
tof 3.00 dn2 1
nt 128 dn2 0
ct 24 dm2 n
alock n dm2 10000
gain not used dseq2
flags n dres2 1.0
il n homo2 DEC3
in n y dfraq3 0
dp n dn3
hs nm
DISPLAY
sp -3770.4 dpwr3 1
wp 31396.7 dn3 0
vs 313 dm3 n
wc 250 dres3 10000
h2mm 125.59 dres3 1.0
is 500.00 homo3 n
rf1 13475.6 lb PROCESSING
rfp 9704.7 lb 1.00
tn 68 wfile
ins 100.000 proc ft
at cdc ph math 131072 f
werr
wexp
wbs
wnt

```

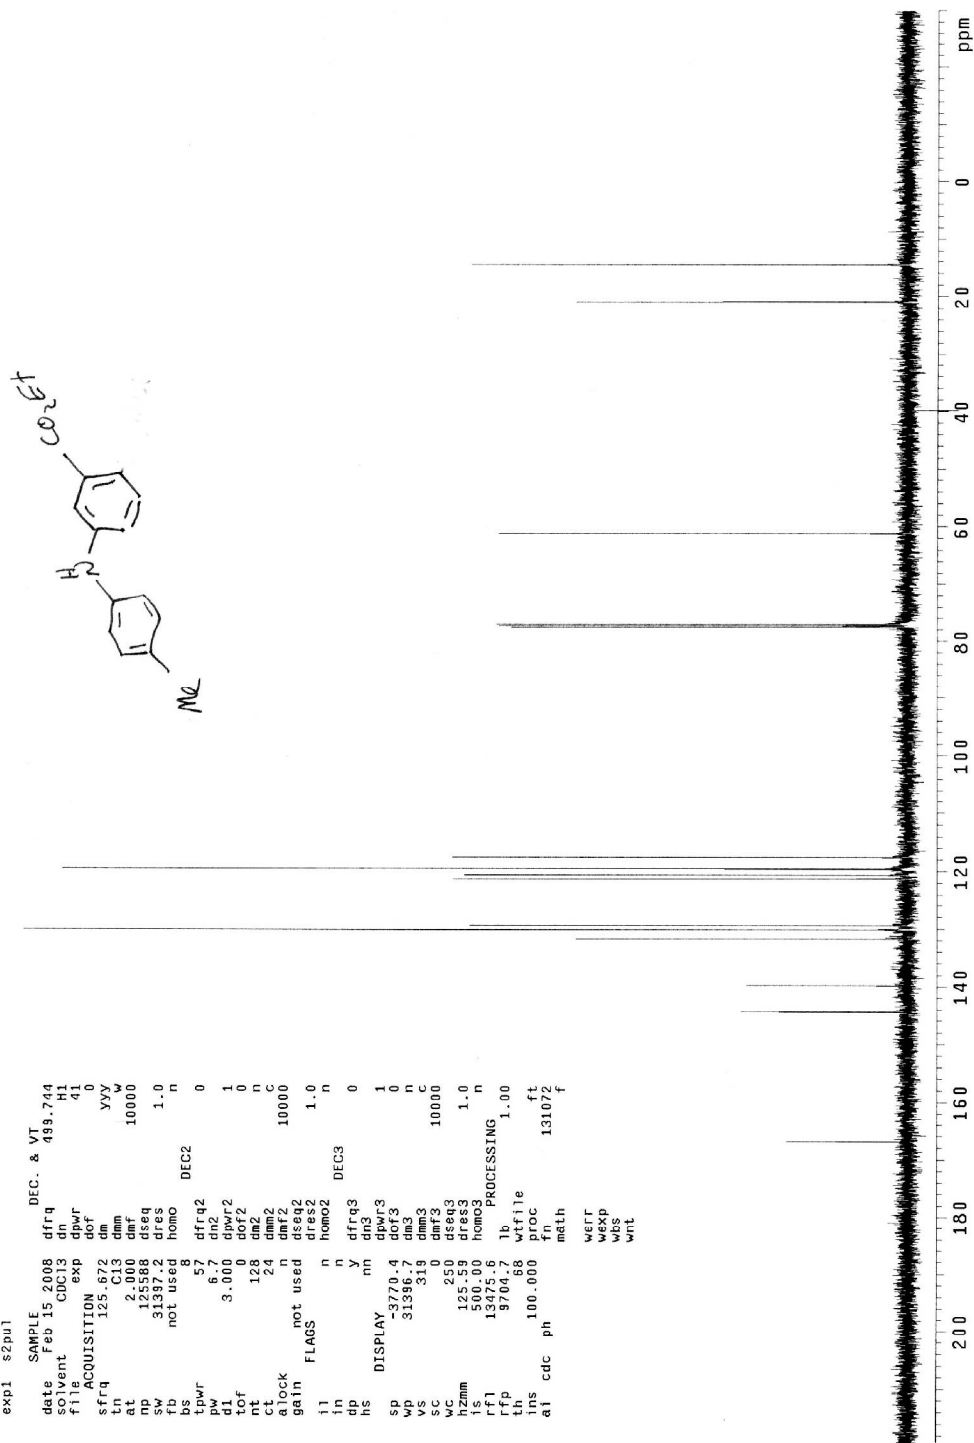

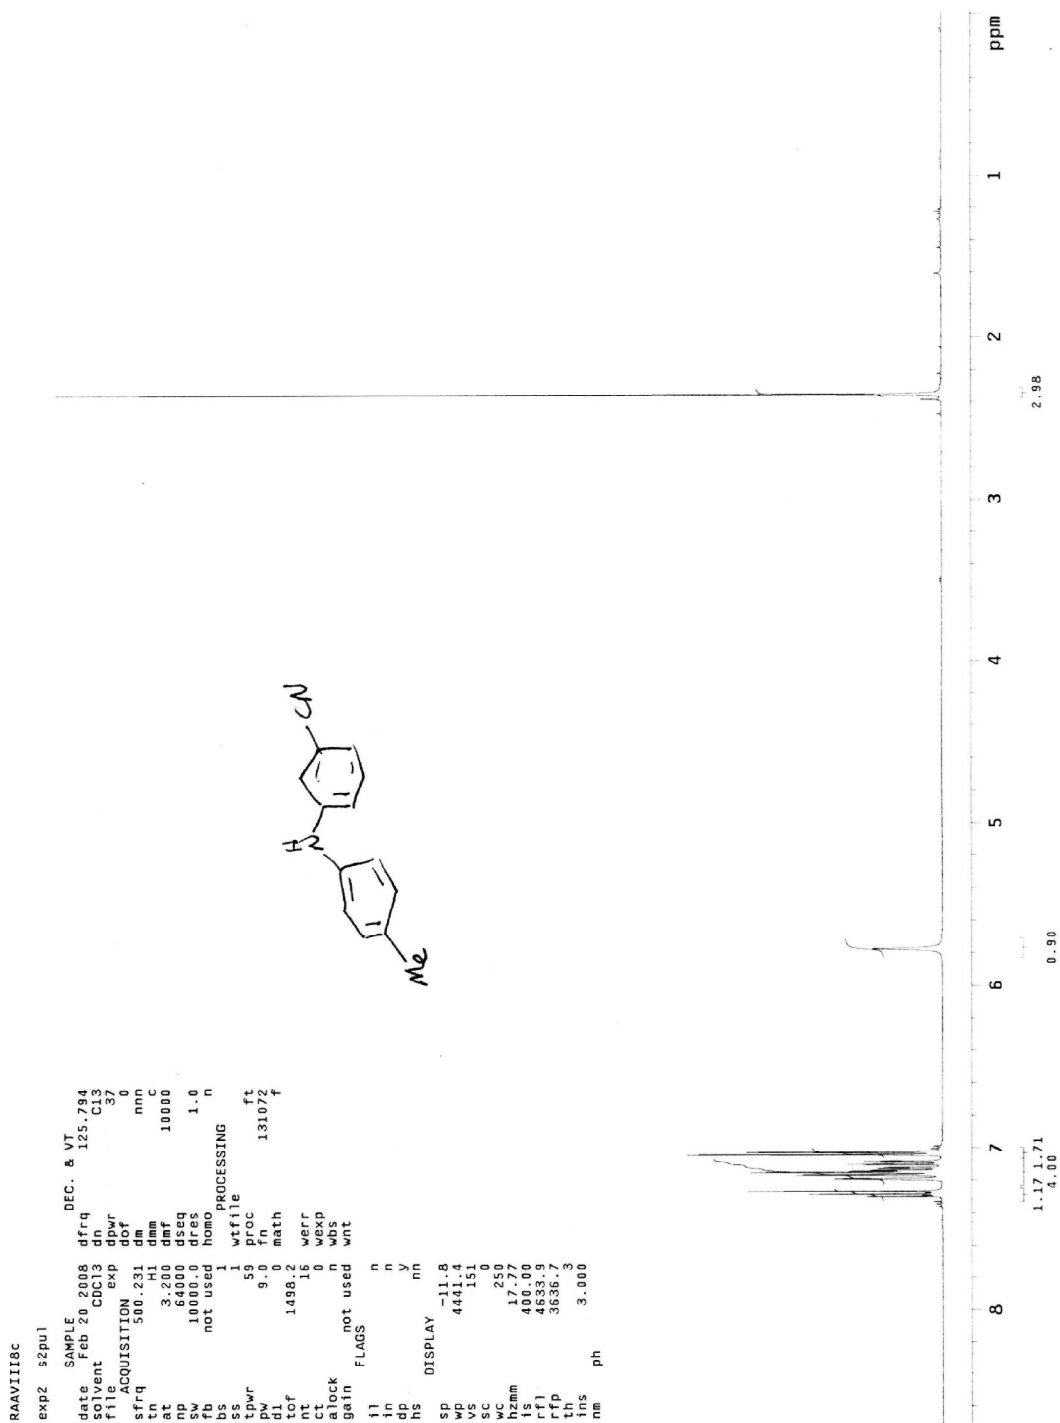

exn1 s2nul

| SAMPLE | DATE       | TIME  | FILE | ACQUISITION | EXP | DOF | DATA | PROCESSING | DEC. & VT |
|--------|------------|-------|------|-------------|-----|-----|------|------------|-----------|
| 1      | Mar 6 2008 | 00:13 | 0013 | exp         | 30  | 0   | nnn  | 10000      | 125.794   |
| 2      | Mar 6 2008 | 00:13 | 0013 | exp         | 30  | 0   | nnn  | 10000      | 125.794   |
| 3      | Mar 6 2008 | 00:13 | 0013 | exp         | 30  | 0   | nnn  | 10000      | 125.794   |
| 4      | Mar 6 2008 | 00:13 | 0013 | exp         | 30  | 0   | nnn  | 10000      | 125.794   |
| 5      | Mar 6 2008 | 00:13 | 0013 | exp         | 30  | 0   | nnn  | 10000      | 125.794   |
| 6      | Mar 6 2008 | 00:13 | 0013 | exp         | 30  | 0   | nnn  | 10000      | 125.794   |
| 7      | Mar 6 2008 | 00:13 | 0013 | exp         | 30  | 0   | nnn  | 10000      | 125.794   |
| 8      | Mar 6 2008 | 00:13 | 0013 | exp         | 30  | 0   | nnn  | 10000      | 125.794   |
| 9      | Mar 6 2008 | 00:13 | 0013 | exp         | 30  | 0   | nnn  | 10000      | 125.794   |
| 10     | Mar 6 2008 | 00:13 | 0013 | exp         | 30  | 0   | nnn  | 10000      | 125.794   |
| 11     | Mar 6 2008 | 00:13 | 0013 | exp         | 30  | 0   | nnn  | 10000      | 125.794   |
| 12     | Mar 6 2008 | 00:13 | 0013 | exp         | 30  | 0   | nnn  | 10000      | 125.794   |
| 13     | Mar 6 2008 | 00:13 | 0013 | exp         | 30  | 0   | nnn  | 10000      | 125.794   |
| 14     | Mar 6 2008 | 00:13 | 0013 | exp         | 30  | 0   | nnn  | 10000      | 125.794   |
| 15     | Mar 6 2008 | 00:13 | 0013 | exp         | 30  | 0   | nnn  | 10000      | 125.794   |
| 16     | Mar 6 2008 | 00:13 | 0013 | exp         | 30  | 0   | nnn  | 10000      | 125.794   |
| 17     | Mar 6 2008 | 00:13 | 0013 | exp         | 30  | 0   | nnn  | 10000      | 125.794   |
| 18     | Mar 6 2008 | 00:13 | 0013 | exp         | 30  | 0   | nnn  | 10000      | 125.794   |
| 19     | Mar 6 2008 | 00:13 | 0013 | exp         | 30  | 0   | nnn  | 10000      | 125.794   |
| 20     | Mar 6 2008 | 00:13 | 0013 | exp         | 30  | 0   | nnn  | 10000      | 125.794   |
| 21     | Mar 6 2008 | 00:13 | 0013 | exp         | 30  | 0   | nnn  | 10000      | 125.794   |
| 22     | Mar 6 2008 | 00:13 | 0013 | exp         | 30  | 0   | nnn  | 10000      | 125.794   |
| 23     | Mar 6 2008 | 00:13 | 0013 | exp         | 30  | 0   | nnn  | 10000      | 125.794   |
| 24     | Mar 6 2008 | 00:13 | 0013 | exp         | 30  | 0   | nnn  | 10000      | 125.794   |
| 25     | Mar 6 2008 | 00:13 | 0013 | exp         | 30  | 0   | nnn  | 10000      | 125.794   |
| 26     | Mar 6 2008 | 00:13 | 0013 | exp         | 30  | 0   | nnn  | 10000      | 125.794   |
| 27     | Mar 6 2008 | 00:13 | 0013 | exp         | 30  | 0   | nnn  | 10000      | 125.794   |
| 28     | Mar 6 2008 | 00:13 | 0013 | exp         | 30  | 0   | nnn  | 10000      | 125.794   |
| 29     | Mar 6 2008 | 00:13 | 0013 | exp         | 30  | 0   | nnn  | 10000      | 125.794   |
| 30     | Mar 6 2008 | 00:13 | 0013 | exp         | 30  | 0   | nnn  | 10000      | 125.794   |
| 31     | Mar 6 2008 | 00:13 | 0013 | exp         | 30  | 0   | nnn  | 10000      | 125.794   |
| 32     | Mar 6 2008 | 00:13 | 0013 | exp         | 30  | 0   | nnn  | 10000      | 125.794   |
| 33     | Mar 6 2008 | 00:13 | 0013 | exp         | 30  | 0   | nnn  | 10000      | 125.794   |
| 34     | Mar 6 2008 | 00:13 | 0013 | exp         | 30  | 0   | nnn  | 10000      | 125.794   |
| 35     | Mar 6 2008 | 00:13 | 0013 | exp         | 30  | 0   | nnn  | 10000      | 125.794   |
| 36     | Mar 6 2008 | 00:13 | 0013 | exp         | 30  | 0   | nnn  | 10000      | 125.794   |
| 37     | Mar 6 2008 | 00:13 | 0013 | exp         | 30  | 0   | nnn  | 10000      | 125.794   |
| 38     | Mar 6 2008 | 00:13 | 0013 | exp         | 30  | 0   | nnn  | 10000      | 125.794   |
| 39     | Mar 6 2008 | 00:13 | 0013 | exp         | 30  | 0   | nnn  | 10000      | 125.794   |
| 40     | Mar 6 2008 | 00:13 | 0013 | exp         | 30  | 0   | nnn  | 10000      | 125.794   |
| 41     | Mar 6 2008 | 00:13 | 0013 | exp         | 30  | 0   | nnn  | 10000      | 125.794   |
| 42     | Mar 6 2008 | 00:13 | 0013 | exp         | 30  | 0   | nnn  | 10000      | 125.794   |
| 43     | Mar 6 2008 | 00:13 | 0013 | exp         | 30  | 0   | nnn  | 10000      | 125.794   |
| 44     | Mar 6      |       |      |             |     |     |      |            |           |

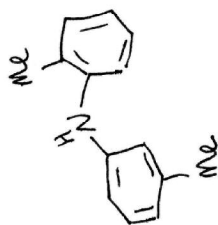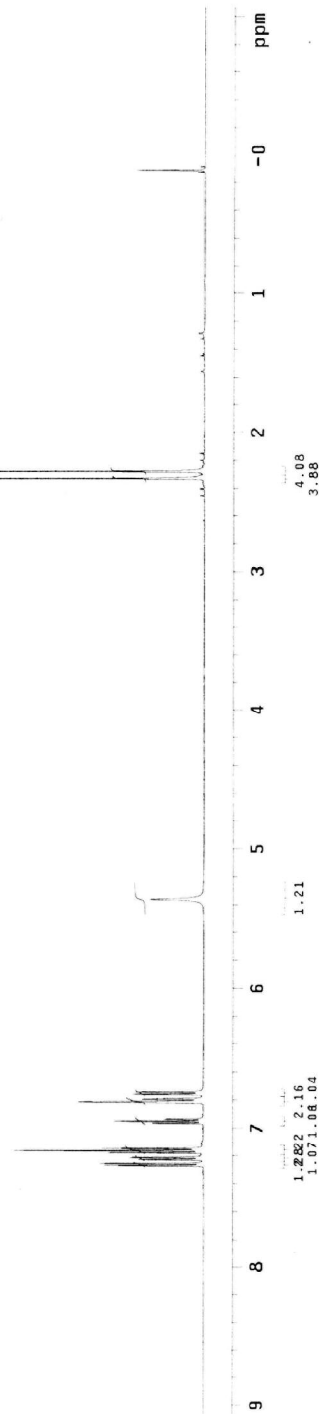

exp2 s2pu1

| SAMPLE      | date | solute | file | ACQUISITION | sfrq     | at    | tn         | dpr   | exp | CD13    | dfrq | DEC. & UT |
|-------------|------|--------|------|-------------|----------|-------|------------|-------|-----|---------|------|-----------|
| Feb 20 2008 |      |        |      |             | 500.231  | H1    | dmm        | C     |     | 125.794 |      |           |
|             |      |        |      |             | 3.200    | dmf   |            | 10000 |     |         |      |           |
|             |      |        |      |             | 64000    | dseq  |            |       |     |         |      |           |
|             |      |        |      |             | 10000.0  | dres  |            |       |     |         |      |           |
|             |      |        |      | not used    |          | homoc | PROCESSING | n     |     |         |      |           |
|             |      |        |      | ss          | 1        | wfile |            |       |     |         |      |           |
|             |      |        |      | tpwr        | 59       | proc  |            |       |     |         |      |           |
|             |      |        |      | pwp         | 9.0      | fn    |            |       |     |         |      |           |
|             |      |        |      | dl          | 1498.2   | math  |            |       |     |         |      |           |
|             |      |        |      | tof         |          | werr  |            |       |     |         |      |           |
|             |      |        |      | ct          | 0        | wexp  |            |       |     |         |      |           |
|             |      |        |      | aalloc      | n        | wbs   |            |       |     |         |      |           |
|             |      |        |      | gain        | not used | wnt   |            |       |     |         |      |           |
|             |      |        |      | FLAGS       |          |       |            |       |     |         |      |           |
|             |      |        |      | in          | n        |       |            |       |     |         |      |           |
|             |      |        |      | dp          | y        |       |            |       |     |         |      |           |
|             |      |        |      | hs          | nn       |       |            |       |     |         |      |           |
|             |      |        |      | DISPLAY     | -11.8    |       |            |       |     |         |      |           |
|             |      |        |      | sp          | 4651.7   |       |            |       |     |         |      |           |
|             |      |        |      | wps         | 151      |       |            |       |     |         |      |           |
|             |      |        |      | vs          | 0        |       |            |       |     |         |      |           |
|             |      |        |      | sc          | 0        |       |            |       |     |         |      |           |
|             |      |        |      | vc          | 250      |       |            |       |     |         |      |           |
|             |      |        |      | am          | 18.1     |       |            |       |     |         |      |           |
|             |      |        |      | ls          | 40.0     |       |            |       |     |         |      |           |
|             |      |        |      | rfl         | 4633.9   |       |            |       |     |         |      |           |
|             |      |        |      | rffp        | 3636.7   |       |            |       |     |         |      |           |
|             |      |        |      | th          | 3        |       |            |       |     |         |      |           |
|             |      |        |      | ins         | 6.000    |       |            |       |     |         |      |           |
|             |      |        |      | ph          |          |       |            |       |     |         |      |           |

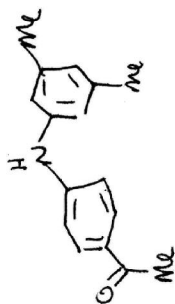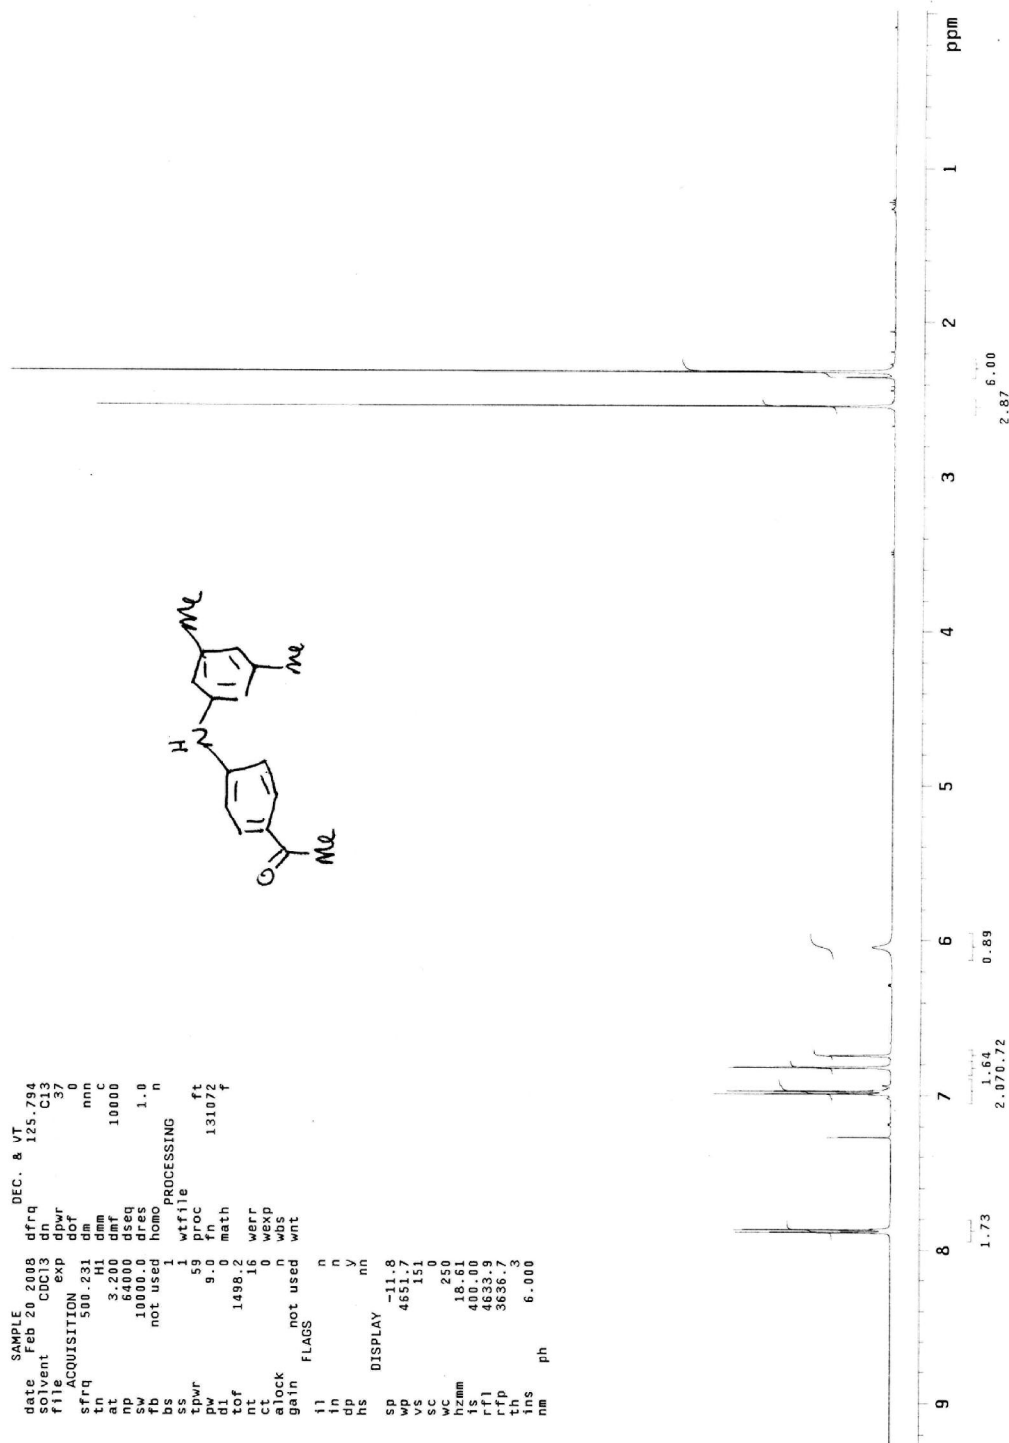

## STANDARD CARBON PARAMETERS

```

exp1  s2pu1
SAMPLE
date   Feb 20 2008   dfrq   DEC. & VT
time   12:00:00     dnt     500.239
file   CDEB         dnt     37
ACQUISITION
sfrq   125.795      dm      y
in     C13          dam      w
at     1.736        dar      10000
np     131010       dseq
fw     37735.8      dres      1.0
bs     not used     homa      n
ss     1            lb      PROCESSING
tpwr   53          wtfile  0.30
pw     6.9         proc     ft
d1     0.763       fn      131072
tof    531.4       math     f
ct     250         werr
alock  0           wexp
gain   not used    wnt
flags  n
il     n
in     n
ip     y
hs     nm
DISPLAY
sp     -6289.2
wp     37735.8
vs     375
sc     250
vc     8.30
hmm    1000
is     500.00
rfj    16004.1
rfp    19714.9
th     10
ins    1.000
a1     ph

```

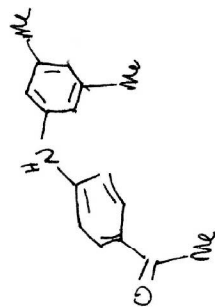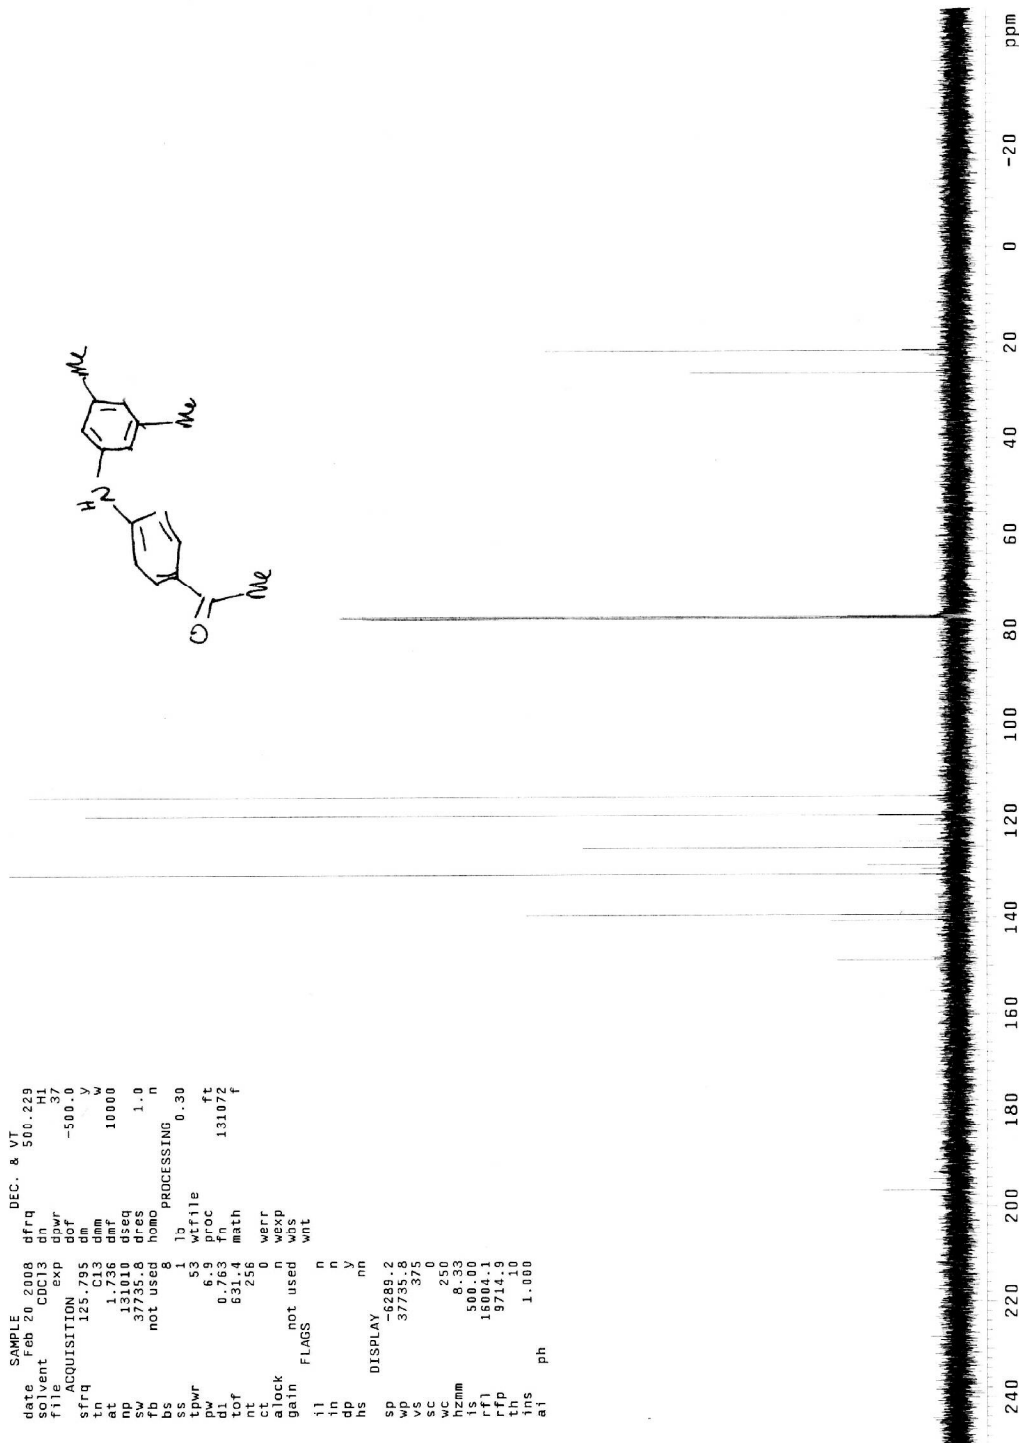

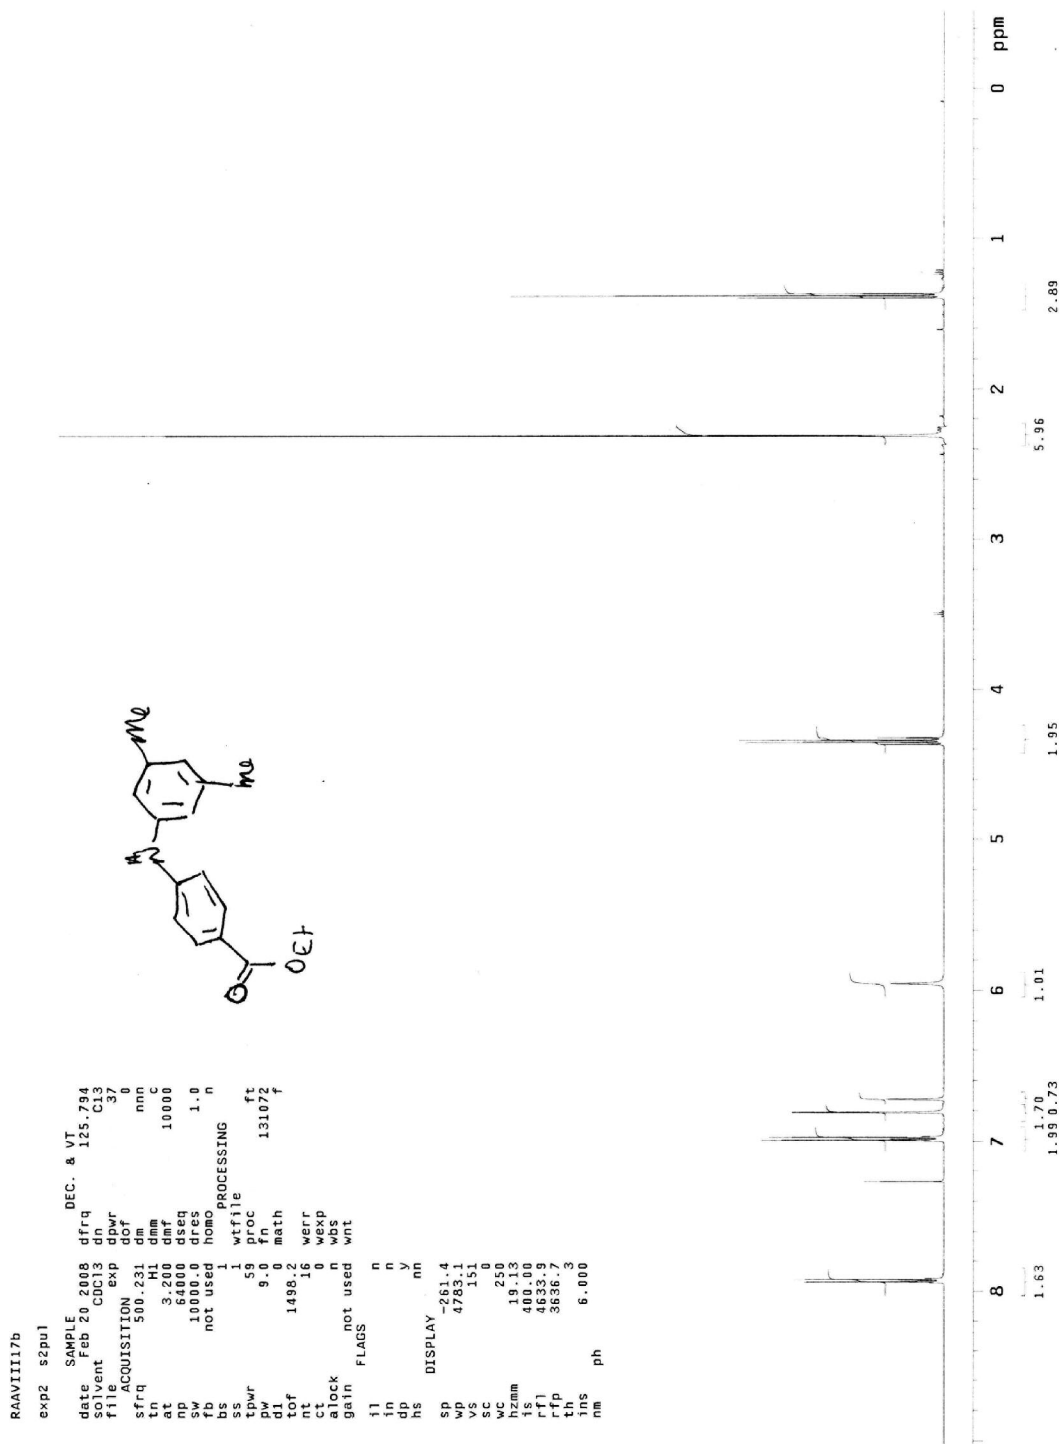

## STANDARD CARBON PARAMETERS

exp1 s2pu1  
 SAMPLE DEC. & VT  
 date Feb 20 2008 dfrq 500.269  
 solvent CDCl3 shc 37  
 fl ACQUISITION exp ddr -500.0  
 sfrq 125.795 dm  
 tn C13 dm  
 at 1.736 dmf 10000  
 np 131010 dseq  
 pw 37735.8 dres 1.0  
 w not used homa n  
 bs not used  
 ss 1 lb PROCESSING 0.30  
 tpwr 53 wfile  
 pw 6.9 proc ft  
 dl 0.763 fn 131072  
 tof 631.4 math f  
 ct 250  
 cl 0 werr  
 alock n wexp  
 gain not used wbs  
 flags wnt  
 ll n  
 ln n  
 dp y  
 hs nm  
 DISPLAY  
 sp -6289.2  
 wp 37735.8  
 vs 371  
 sc 0  
 wc 250  
 hzmm 8  
 hnm 53  
 rfi 500.0  
 rfi 16004.1  
 rfp 9714.9  
 th 10  
 ins 1.000  
 al ph

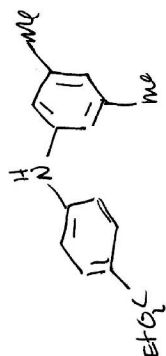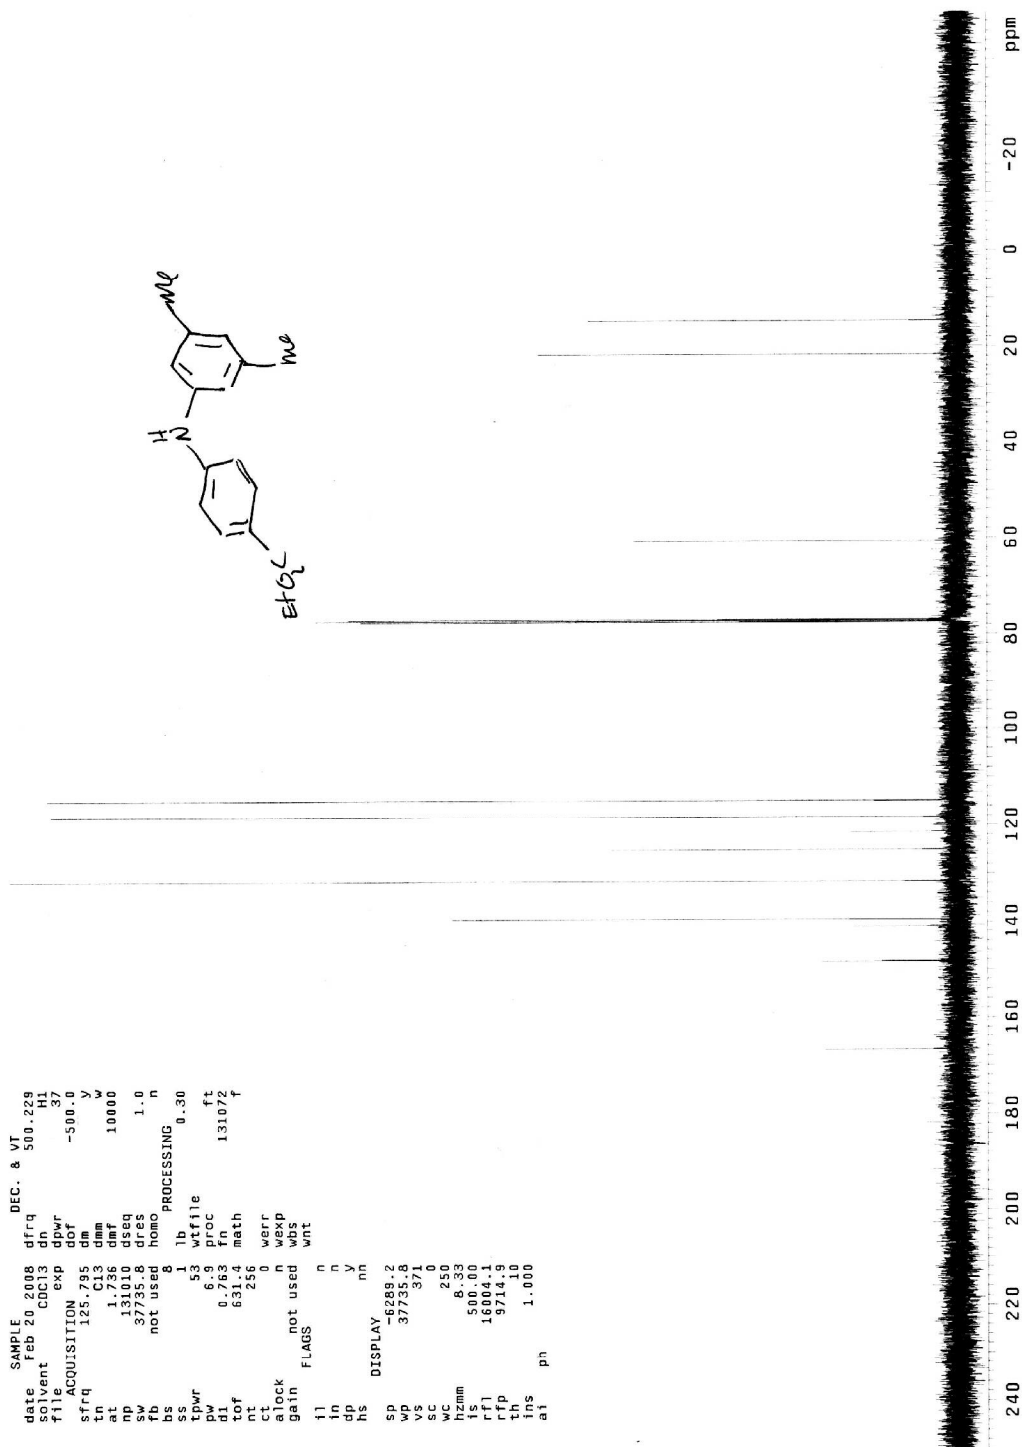

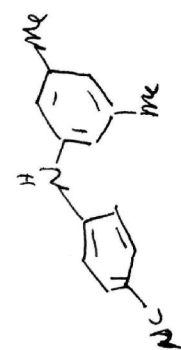

RAAVIII17c  
exp2 szpu1  
SAMPLE  
date Feb 20 2008 dfrq DEC. & VT  
solvent CDCl3 dn 125.784  
file C013 exp 37  
ACQUISITION  
sfrq 500.231 dm nnn  
tn H1 dmm  
at 3.200 dmf  
p 3.200 dmf  
sw 10000.0 dres 1.0  
fb not used homo 1.0  
bs 1  
ss 1  
tpwr 59 proc  
pw 9.0 fn  
v 131072  
tof 1498.2 math  
nt 16 werr  
ct 0 wexp  
alock n wbs  
gain not used wnt  
f1 n  
f2 n  
dp n  
hs nn  
DISPLAY  
sp -12.5  
wp 5124.7  
vs 151  
vc 250  
hzam 20.50  
ts 400.00  
rfl 4634.6  
rfp 3636.7  
th 5  
ins 6.000  
nm ph

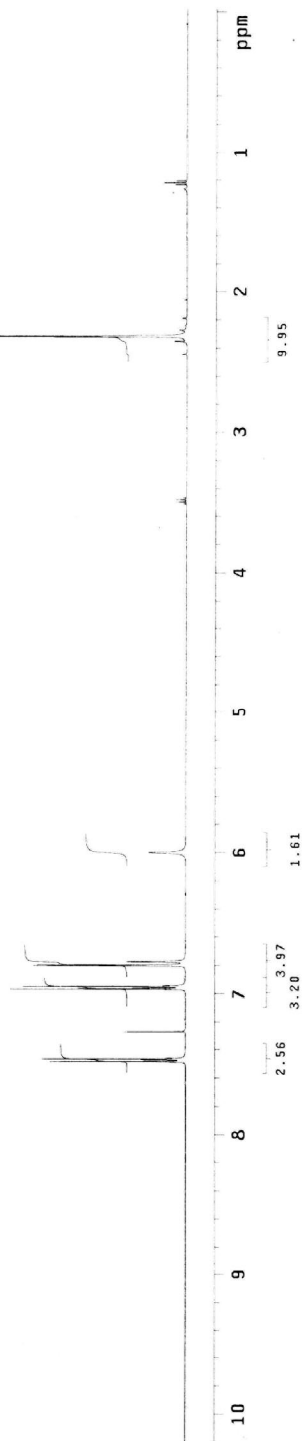

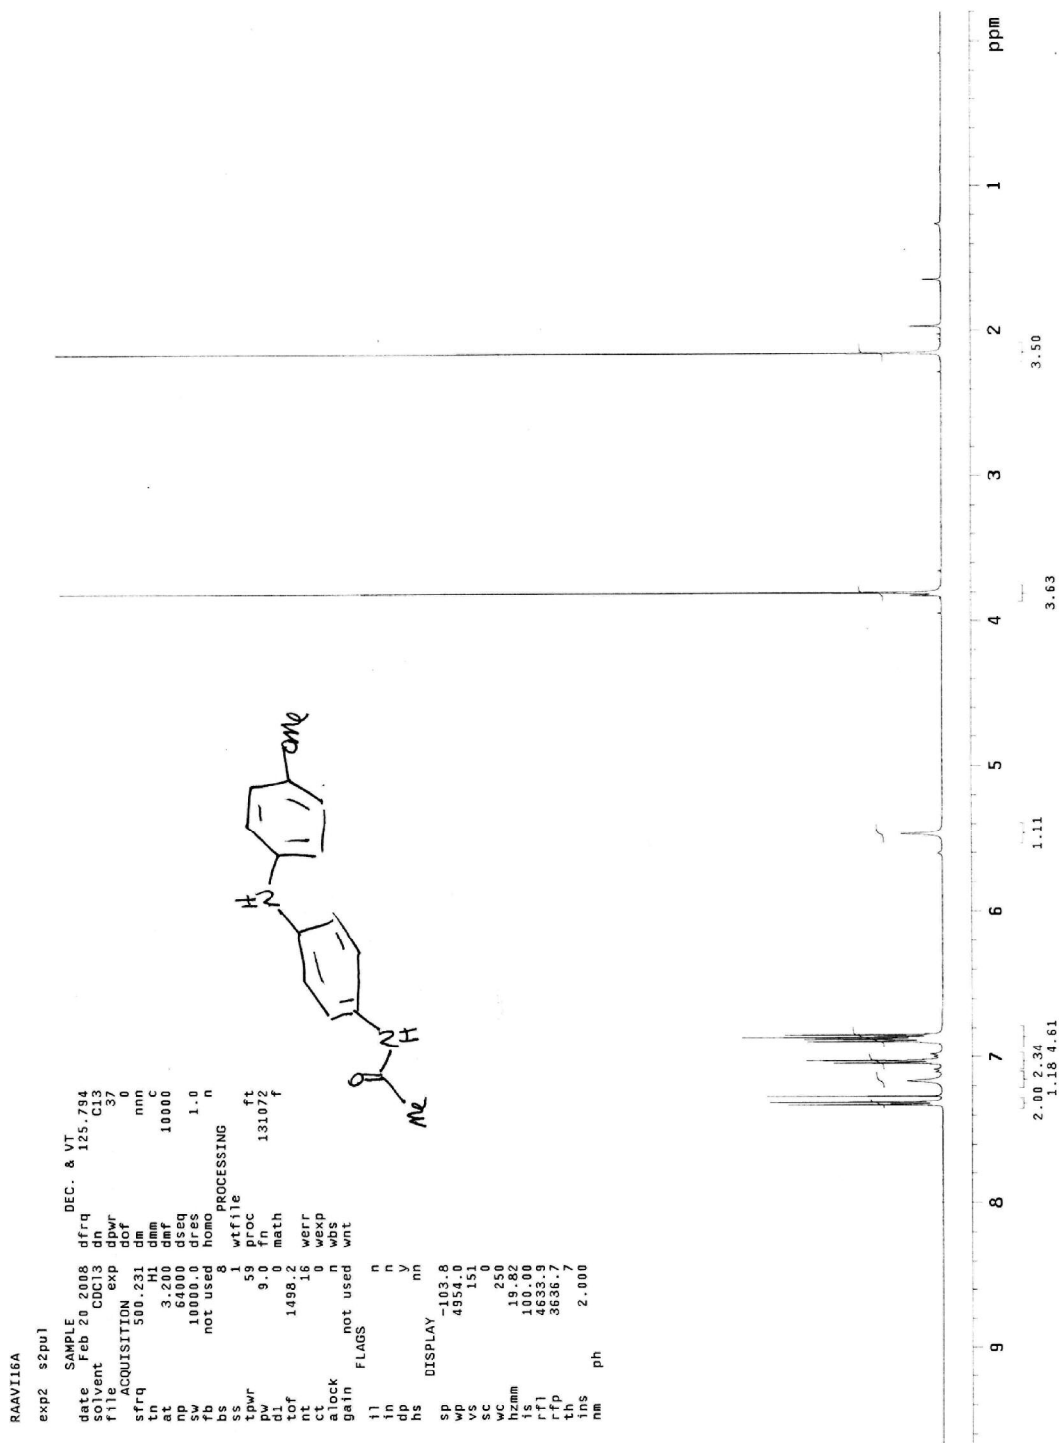

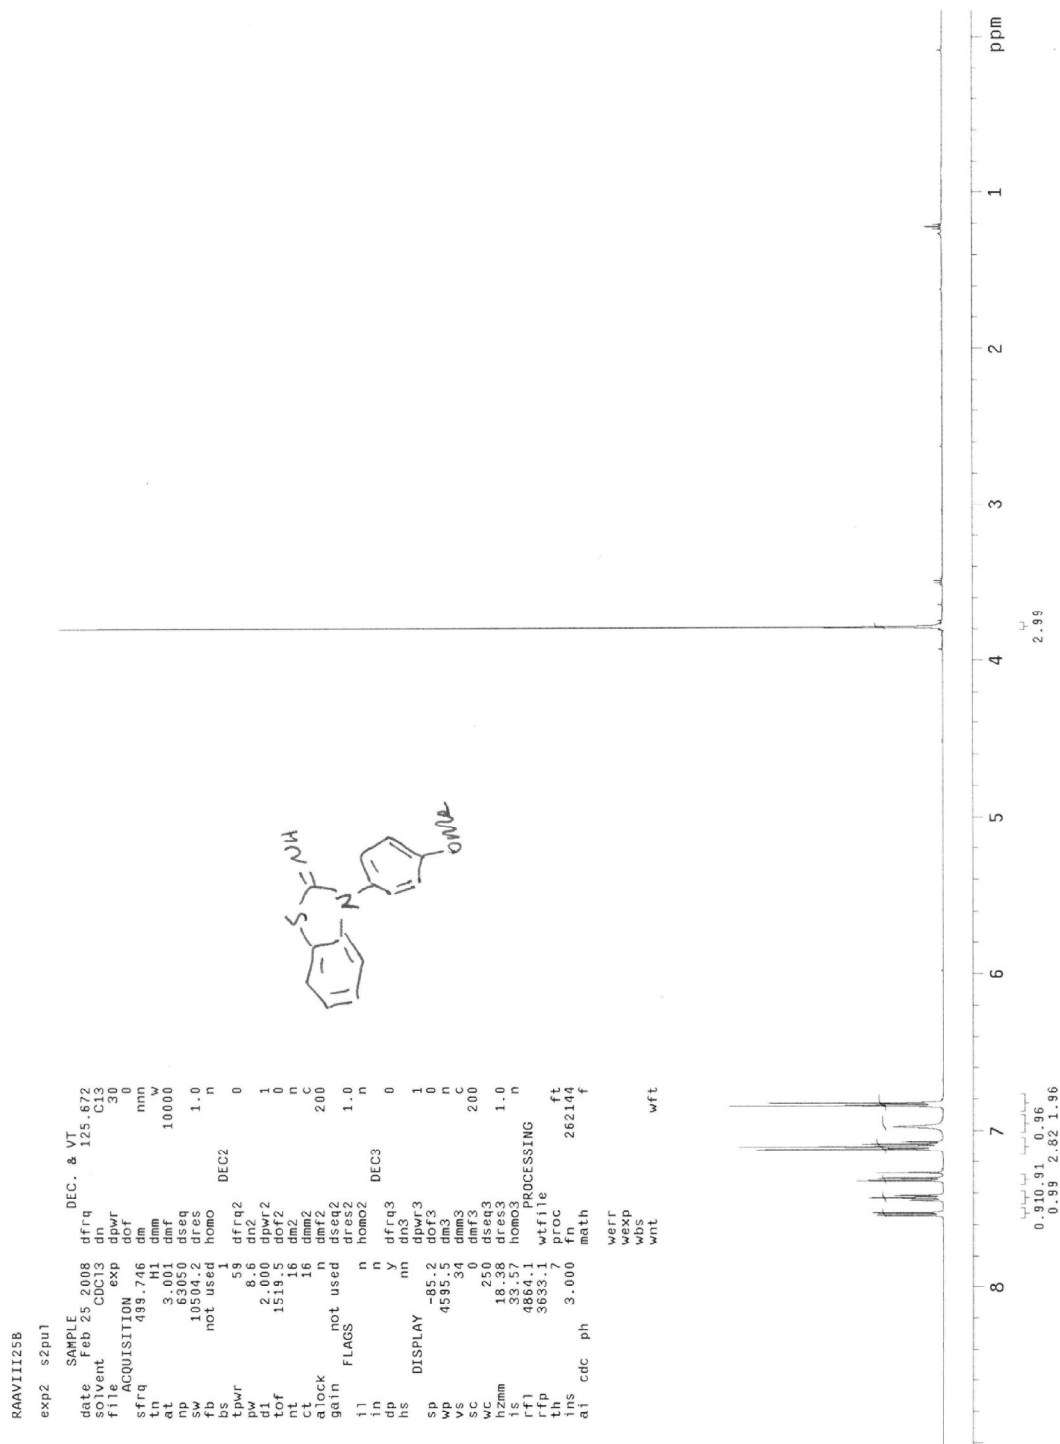

## STANDARD CARBON PARAMETERS

```

exp2 s2pul
SAMPLE
date Feb 14 2008 ifrq DEC. & VT
solvent CDCl3 dn 500.229
file exp H1
sfrq 125.795 exp 37
dof -500.0
dm 10000
at 1.756
np 131010 dseq
sw 37735.8 dres 1.0
fb not used homo n
bs 8
ss 1
t1w 1 lb 4.30
t2w 58 wfile
d1 0.763 proc ft
tof 631.4 math 131072
nt 256
ct 170 werr
alock n wexp
gain not used wbs
fl FLAGS n wnt
in n
in n
dp y
hs nn
DISPLAY
sp -6292.7
wv 37735.8
vs 350
sc 250
wc 150.94
hzmm 500.00
ts 16007.6
rfl 9714.9
thp
ins 1.000
ai ph

```

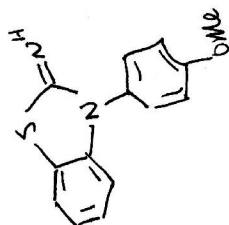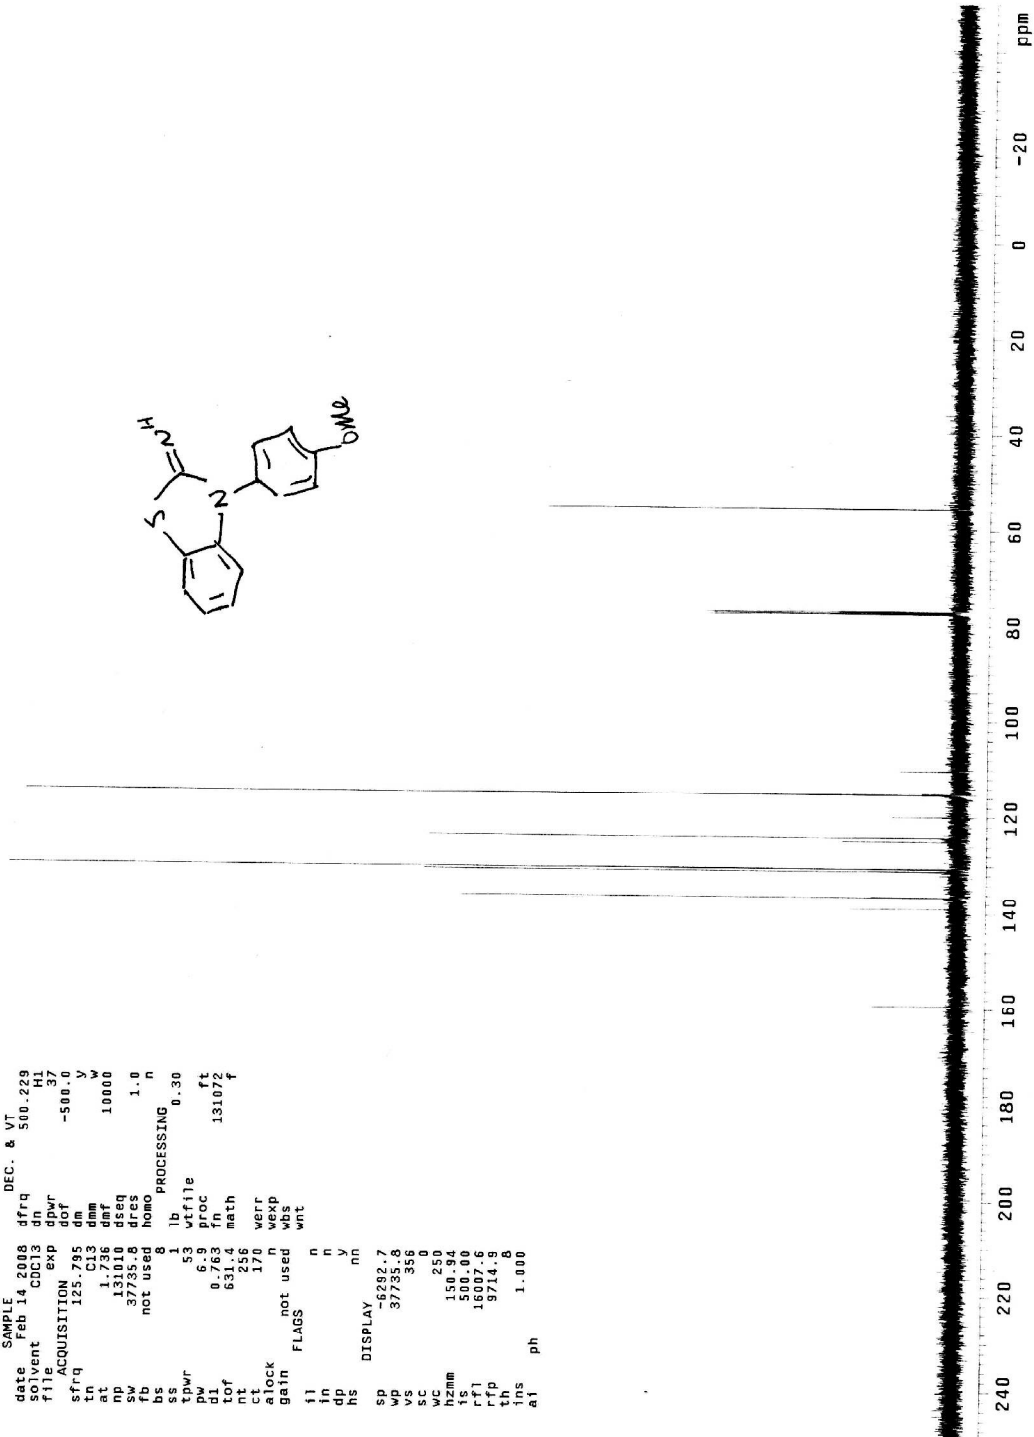

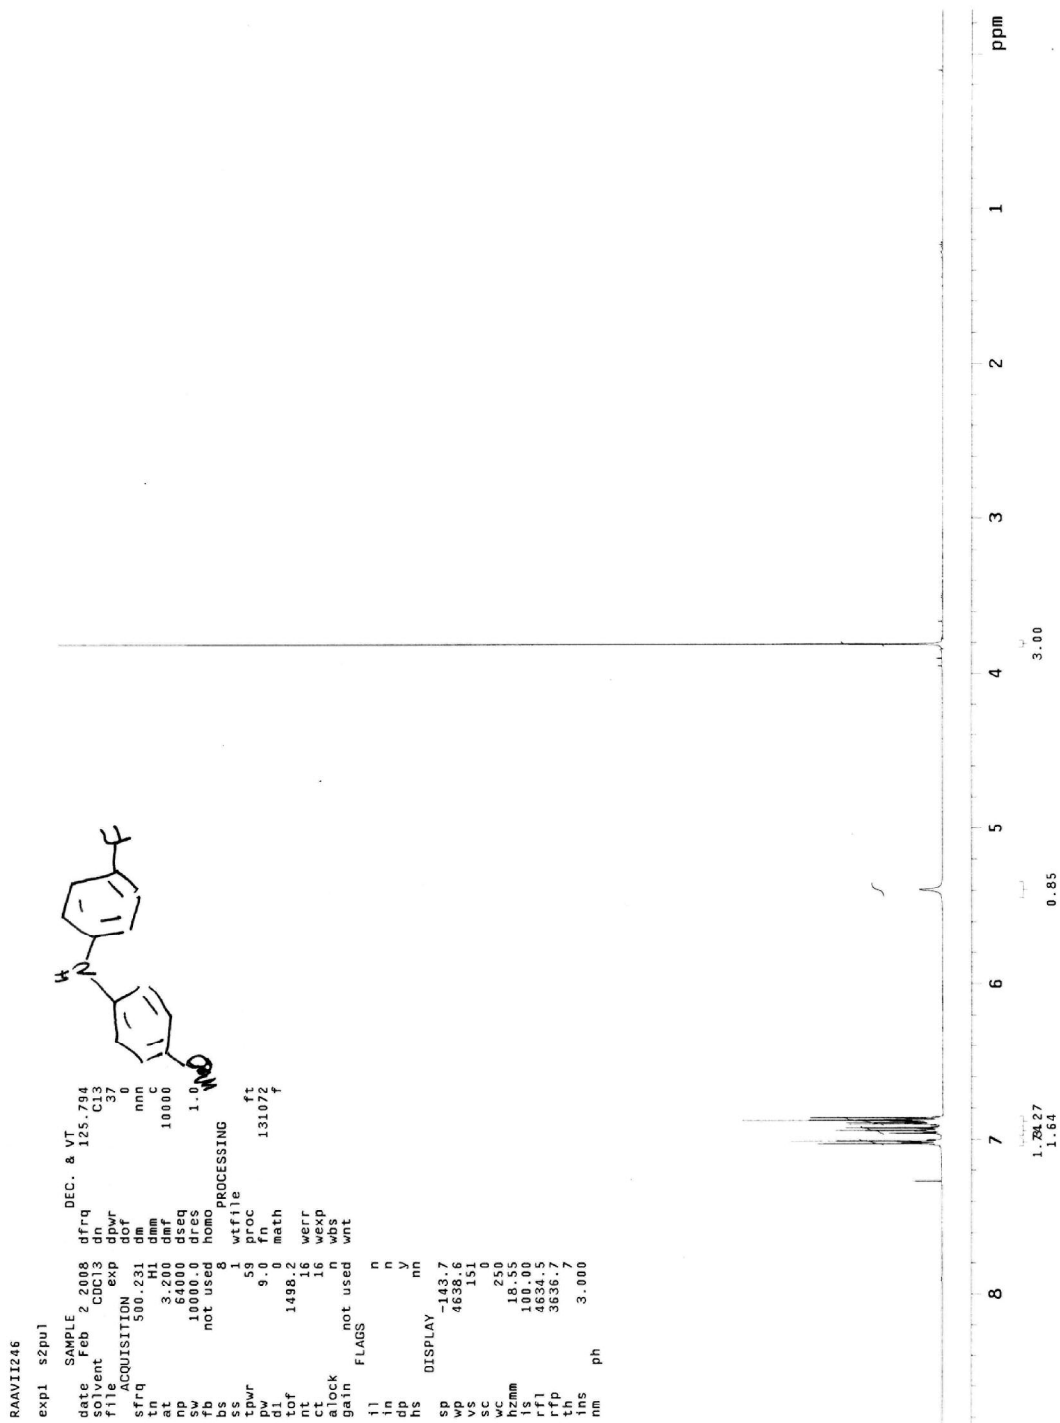

RAAVIII57

exp2 \$2pu1

SAMPLE 2008 DEC. & VT  
 date Mar 20 125.794  
 solvent CDCl3  
 file ACQUISITION exp 37  
 sfrq 500.231 dm nnn  
 tn 3.200 dm c  
 at 6400 dm 10000  
 ap 10000 dm 1.0  
 tb not used homo  
 bs 1 wtfile  
 ss 1 wtfile  
 tpwr 59 proc ft  
 pw 9.0 fn 131072  
 df 1498.0 math  
 rf 16 werr  
 ct 16 wexp  
 alock n wbs  
 gain not used wnt  
 flags  
 ll n  
 in n  
 op n  
 bs nm  
 DISPLAY  
 sp -182.5  
 wp 4691.1  
 vs 151  
 sc 0  
 sz 255  
 hzmm 18.76  
 ls 100.00  
 rfl 4633.9  
 rfp 3636.7  
 th 12  
 ins 12  
 nm 2.000  
 ph

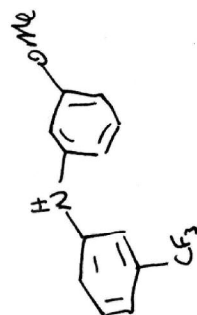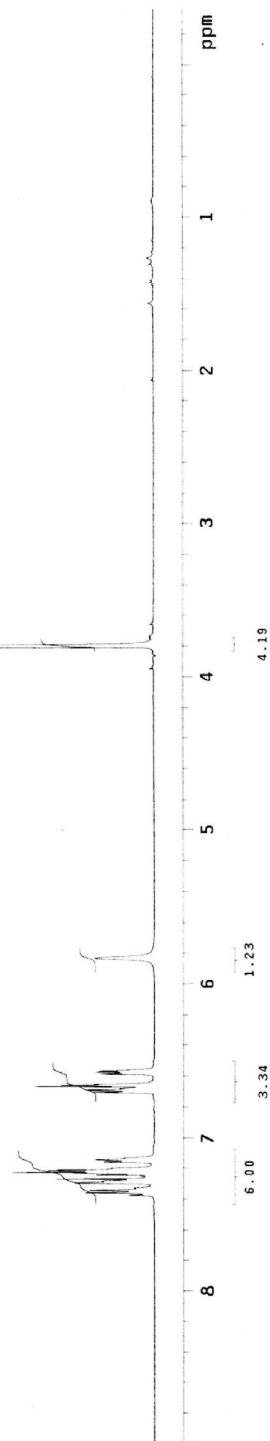

RAAVIII56  
exp2 82pul

SAMPLE  
date Mar 20 2008  
solvent CDCl3  
filtime 37  
ACQUISITION exp 37  
500.231 dm nnn C  
tn H1 dmm 10000  
at 3.200 dmf  
np 64000 dseq  
pw 10000.0 dres 1.0  
not used  
bs 1  
ss 1 wfile  
tpwr 59 proc ft  
pw 9.0 fn 131072  
d1 1498.2 math  
tof 16 wepp  
ct 16  
gain not used wnt  
FLAGS  
ll n  
ln n  
dp y  
hs nm  
DISPLAY  
sp -169.4  
wp 5045.9  
vs 151  
sc 0  
mc 250  
hmm 20.118  
ts 100.00  
rf1 4833.9  
rfp 3636.7  
th 7  
ins 2.000  
nm ph

DEC. & VT  
125.794  
C13  
37  
0  
nnn C  
10000  
1.0  
n  
ft  
131072  
f

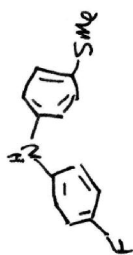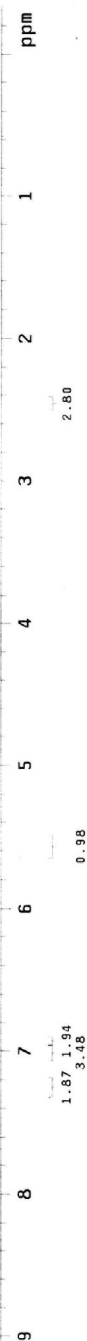

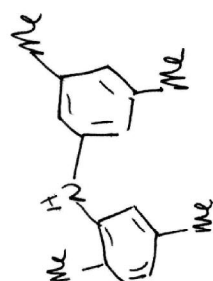

RAAVI254a  
exp2 s2pu1

|         |                 |                |         |
|---------|-----------------|----------------|---------|
| date    | Feb 2 2008      | DEC. & VT      | 125.794 |
| file    | CDI3            | nm             | 37      |
| file    | ACQUISITION exp | nm             | 0       |
| sfrq    | 500.231         | dm             | nm      |
| tn      | 3.200           | dm             | 10000   |
| at      | 6400            | dsq            |         |
| pw      | 10000.0         | pres           | 1.0     |
| bs      | not used        | homoprocessing | n       |
| ss      | 8               | wtfile         | ft      |
| tpwr    | 59              | proc           | 131072  |
| dl      | 9.0             | fn             | math    |
| tof     | 1498.12         | wexp           | 16      |
| ct      | 16              | wbs            |         |
| gain    | not used        | wnt            |         |
| flags   |                 |                |         |
| il      | n               |                |         |
| in      | n               |                |         |
| dp      | y               |                |         |
| hs      | nm              |                |         |
| display |                 |                |         |
| sp      | -118.3          |                |         |
| wp      | 4704.2          |                |         |
| vs      | 151             |                |         |
| sc      | 0               |                |         |
| mcmm    | 1830            |                |         |
| ls      | 100.00          |                |         |
| rfl     | 4635.2          |                |         |
| rfp     | 3636.7          |                |         |
| th      | 7               |                |         |
| ins     | 1.000           |                |         |
| nm      | ph              |                |         |

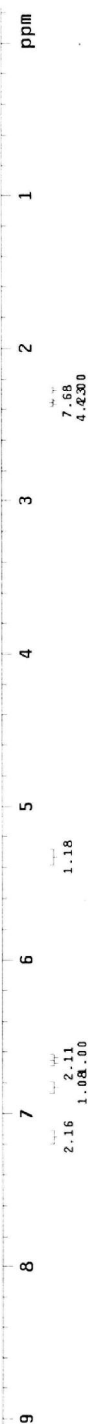

## STANDARD CARBON PARAMETERS

```

exp1 s2pu1
SAMPLE 2 2008 DEC. & VT
date Feb CDC13 dn 500.229
solvent file exp 37
file ACQUISITION dof -500.0
sfrq 125.795 dm y
tn C13 dmm w
at 131016 dmm
sw 37735.8 dres 10000
fb not used homo 1.0
bs 8 PROCESSING n
ss 1 lb 0.30
tpwr 53 wtfile
pv 0.79 proc ft
tof 6314 math 131072
nt 255
ct 104 werr
alock n wexp
gain not used wbs
il n wnt
in n
dp n
hs nn
DISPLAY
sp -6301.9
wp 37735.8
xs 106
wc 0
h2mm 250
h2mm 150.94
is 500.00
rfl 16016.8
rfp 9714.9
tn 9
tms 1.000
at ph

```

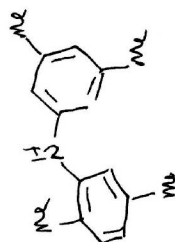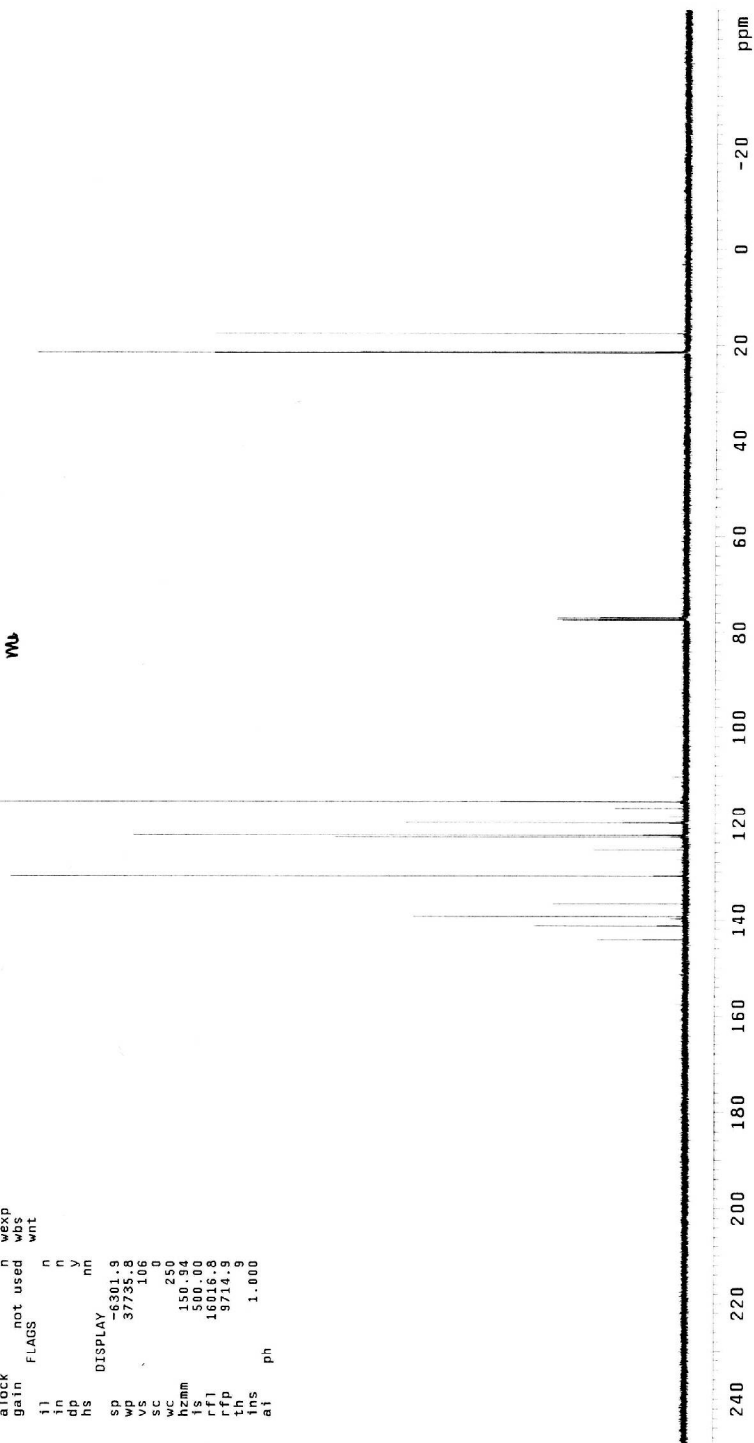

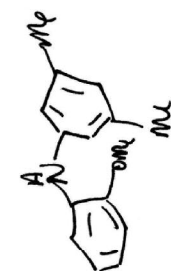

RAAVIII63  
exp2 \$2pu1  
date SAMPLE 2008 DEC. & VT  
solvent Mar 20 CDC13 125.794  
file ACQUISITION exp dpr 37  
sfrq 500.231 dm nnn 0  
tn H1 dmm 10000 C  
at 3.200 dmf  
ap 4800 dseq  
sp 10000.0 dm  
fb not used homo 1.0 n  
bs 1 wtfile  
ss 1 wtfile  
tpwr 59 proc ft  
pw 9.0 fn 131072 f  
ti 1498.2 math  
tf 64 werr  
ct 26 wexp  
alock n wbs  
gain not used wnt  
fl n  
fl n  
dp n  
hs n  
hs DISPLAY  
sp -64.4  
wp 4783.1  
vs 151  
vc 250  
hzmm 19.13  
ts 100.00  
rfl 4834.0  
rfp 3636.7  
th 4  
ins 5.000  
nm ph

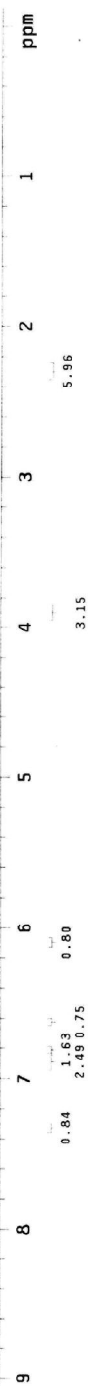

RAAVIII46a

```

expl s2pul
SAMPLE
date Mar 6 2008 dfrq DEC. & VT
solvent CDCl3 d1 125.784
file ACQUISITION exp d0f 37
sfrq 500.231 dm nnn c
tn H1 dmm 10000
at 3.200 dmf
np 100000 dseq
sp 1000000 d1s
fb not used homo 1.0 n
bs 2 PROCESSING
ss 1 wtfile
tpwr 59 proc ft
pw 9.0 fn 131072
d1 1498.2 math
pt 16 werr
ct 16 wexp
alock n wbs
gain not used wnt
flags
ll n
ln n
dp n
hs nn
DISPLAY
sp -63.9
wp 5137.9
vs 151
sc 250
hzmm 20.55
ls 100.00
rfl 4633.6
rfp 3636.7
th
ins
nm ph

```

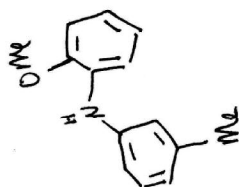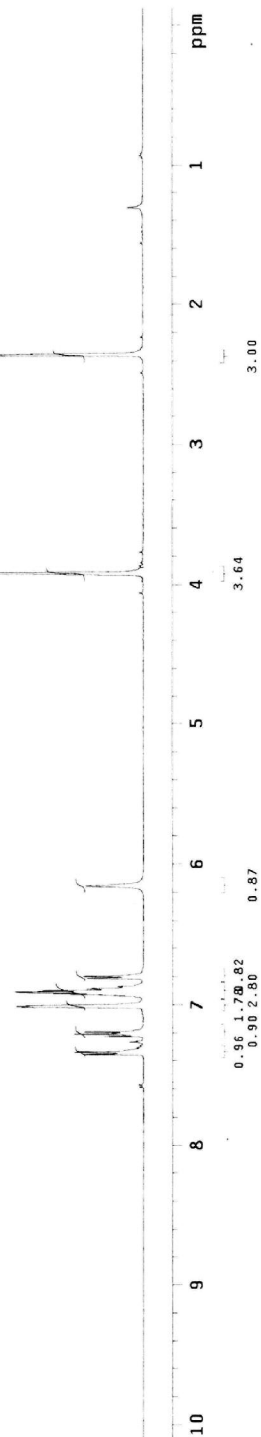

RAAVI1158

exp2 s2pul

SAMPLE DEC. & VT  
 date Mar 20 2008 dfrq 125.794  
 solvent CDCl<sub>3</sub> C13  
 file 37  
 ACQUISITION exp 0  
 sfrq 500.231 dm nnn  
 tn 3.200 dmf c  
 at 64000 dseq 10000  
 np 1000000 PRES 1.0  
 ps not used HOMO PROCESSING n  
 bs 1 wfile  
 ss 1 wfile  
 tpwr 59 proc ft  
 pw 9.0 fn 131072 f  
 dl 1498.16 math  
 tof 16 wexp  
 ct 16 wexp  
 alock n wbs  
 gain not used wnt  
 FLAGS  
 il n  
 in n  
 pp y  
 ns nm  
 DISPLAY  
 sp -116.9  
 wp 5269.2  
 vs 151  
 sc 0  
 mc 268  
 hzmm 21.98  
 rs 106.00  
 rfl 4633.9  
 rfp 3636.7  
 th 5  
 ins 6.000  
 nm ph

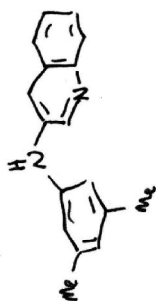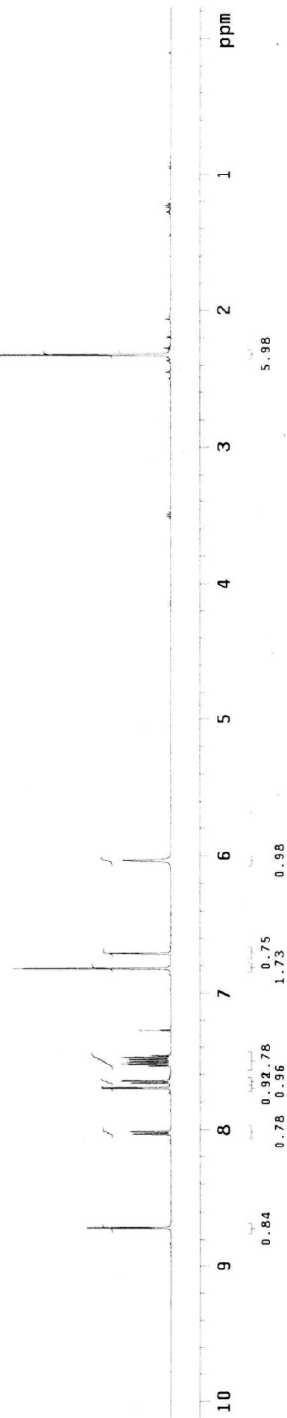

## STANDARD CARBON PARAMETERS

```

exp1  s2pu1
SAMPLE
date   Mar 20 2008   dfrq   DEC. & VT
solvent CDC13      dn      H1
file    exp         dpr     37
ACQUISITION exp     dpr     -500.0
sfrq    125.795    dm      y
tn      C13        dm      y
at      1.736      dm      10000
np      131010     dseq
sw      37735.8    dres     1.0
fb      not used   homo
bs      0          lb      PROCESSING 0.30
tpwr    53         wtfile
pw      6.9        proc
d1      0.763      fn      ft
tof     631.4      math    131072
nt      256        werr    f
ct      58         werr
alock   n          werr
gain    not used   werr
flags   not used   werr
il      n          n
in      n          n
dp      y          y
hs      nn         nn
DISPLAY
sp      6284.4     vs
wp      37735.8    vs
vs      155        vs
sc      0          sc
wc      250        wc
hzmm    150.94     hzmm
fs      500.00     fs
rfi     1913.9     rfi
rfp     1913.9     rfp
th      11         th
ins     1.000     ins
ai      ph         ai

```

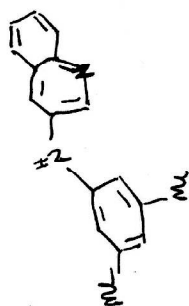

240 220 200 180 160 140 120 100 80 60 40 20 0 -20 ppm

## References

---

- <sup>i</sup> Nordiff, E. A.; Hausman, M. *J. Org. Chem.* **1964**, 29, 2453.
- <sup>ii</sup> Toyama, T.; Toyama, I.; Nimura, M.; Kamiyama, N.; Yokota, M. Biaryl compounds and diaryl ethers as uricosuric agents. Jpn. Kokai Tokkyo Koho, JP/2000001431 A 20000107, 2000.
- <sup>iii</sup> Spagnolo, P.; Zanirato, P. *Tetrahedron Lett.* **1987**, 28, 961.
- <sup>iv</sup> Buchwald, S. L.; Klapars, A.; Antilla, J. C.; Job, G. E.; Wolter, M.; Kwong, F. Y.; Nordmann, G.; Hennessy, E. J. Copper-catalyzed formation of carbon-heteroatom and carbon-carbon bonds by arylation and vinylation of amines, amides, hydrazides, heterocycles, alcohols, enolates, and malonates, using aryl, heteroaryl, and vinyl halides and analogs. WO/2002085838 A1, 2002.
- <sup>v</sup> Erdley, et Al. *Acta Chim. Acad. Sci Hung.* **1957**, 12, 251.
- <sup>vi</sup> Zhang, Hui; Cai, Qian; Ma, D. *J. Org. Chem.* **2005**, 70, 5164.
- <sup>vii</sup> Thu-Cuc, T., et al. *J. Heterocycl. Chem.* **1964**, 1, 28.
- <sup>viii</sup> Nordiff, E. A.; Craig, P. N. *J. Org. Chem.* **1961**, 26, 824.
- <sup>ix</sup> Zhang, X. X.; Harris, M. C.; Sadighi, J. P.; Buchwald, S. L. *Can. J. Chem.* **2001**, 79, 1799.
- <sup>x</sup> Sridharan, V.; Karthikeyan, K.; Muthusubramanian, S. *Tetrahedron Lett.* **2006**, 47, 4221.
